# Supplementary material for: Enhanced photocatalytic hydrogen production of microporous organic polymers by incorporation of afterglow phosphorescent materials
Source: Royal Society of Chemistry journal article supplement (doi:10.1039/d3ta02348f), 2023-01-01
Supplement: d3ta02348f1.pdf [file d3ta02348f1.pdf]

*Electronic Supplementary Information for*  
**Enhanced photocatalytic hydrogen production of microporous organic polymers  
by afterglow phosphorescent materials**

Sang Hyun Ryu,<sup>a</sup> Gye Hong Kim,<sup>b</sup> Tae Kyu Ahn,<sup>ac\*</sup> Kyoung Chul Ko<sup>d\*</sup> and Seung Uk Son<sup>a\*</sup>

<sup>a</sup> Department of Chemistry, Sungkyunkwan University, Suwon 16419, Korea

E-mail: [sson@skku.edu](mailto:sson@skku.edu)

<sup>b</sup> Department of Earth Systems and Environmental Sciences, Chonnam National University, Gwangju 61186, Korea

<sup>c</sup> Department of Energy Science, Sungkyunkwan University, Suwon 16419, Korea

E-mail: [taeahn@skku.edu](mailto:taeahn@skku.edu)

<sup>d</sup> Department of Chemistry Education, Chonnam National University, Gwangju 61186, Korea

E-mail: [kcho1982@jnu.ac.kr](mailto:kcho1982@jnu.ac.kr)

## Experimental Section

**General:** SEM images were obtained using a JSM6700F microscope at the Chiral Material Core Facility Center of Sungkyunkwan University. PXRD patterns were obtained using a Rigaku MAX-2200 equipment. XPS spectra were obtained using a Thermo VG spectrometer. IR spectra were obtained using a Bruker VERTEX70 spectrometer. Solid <sup>13</sup>C NMR spectra (CP/TOSS) were obtained using a 500 MHz Bruker ADVANCE II NMR spectrometer. N<sub>2</sub> adsorption-desorption isotherm curves were obtained at 77K using a Micromeritics ASAP2020 equipment. The surface areas were characterized according to the BET theory. Pore size distribution diagrams were obtained by the NLDFT method. Reflectance spectra were obtained using a JASCO V-760 spectrometer. Emission spectra were obtained using a JASCO FP-6200 spectrometer. TGA analysis were conducted using a Seiko Exstar 7300 equipment. ICP-AES analysis was conducted using an OPTIMA8300 equipment. Emission decay curves were obtained at the KBSI (Daegu center) using a confocal MicroTime-200 microscope (Picoquant, Germany). A single-mode pulsed diode laser (375 nm with 30 ps pulse width, average power of 10 nW) was used as an excitation light source. A dichroic mirror (Z375RDC, AHF), a long pass filter (HQ405lp, AHF), a 75 μm pinhole, and an avalanche photodiode detector (PDM series, MPD) were used to collect emission photons. A time-correlated single-photon counting system (PicoHarp300, PicoQuant GmbH, Germany) was used to count the emission photons. Exponential fitting was conducted using the Symphotime-64 software (ver. 2.2). Steady-state PL spectrum was obtained by dividing and guiding emission photons through an optical fiber to the external spectrometer (F-7000, Hitachi). Photocurrents were measured using a CHI 660C equipment, a 300 W Xenon lamp as a light source, 0.1 M Na<sub>2</sub>SO<sub>4</sub> as electrolyte, 5 wt% Nafion as a binder, FTO glass as a working electrode, Ag/AgCl as a reference electrode, and a Pt wire as a counter. EIS studies were conducted in the frequency range of 10<sup>-2</sup>~10<sup>5</sup> Hz using a ZIVE sp1 equipment (WonAtech Co.).

## *Synthetic procedures of AG-MOP-TADS-Pds, MOP-TADS-Pd2, and AG-Pd*

For the preparation of AG-MOP-TADS-Pd<sub>2</sub>, tris(4-trimethylstannylphenyl)amine and 3,7-dibromodibenzothiophene sulfone were prepared by the synthetic method reported in the literature.<sup>1</sup> AG (a commercial Sr<sub>4</sub>Al<sub>14</sub>O<sub>25</sub>: Eu, Dy, B, PANAX Blue FB 800, UKSEUNG Chemical Co., 60 mg), (PPh<sub>3</sub>)<sub>4</sub>Pd (37 mg, 32 μmol), and distilled DMF (20 mL) were added to a flame-dried 50 mL two-necked Schlenk flask under argon. After treating the reaction mixture with sonication for 30 min, tris(4-

trimethylstannylphenyl)amine (20 mg, 27  $\mu\text{mol}$ ) and 3,7-dibromodibenzothiophene sulfone (15 mg, 40  $\mu\text{mol}$ ) were added. The reaction mixture was stirred at 120  $^{\circ}\text{C}$  for 24 h. After being cooled to room temperature, the solid was separated by centrifugation, washed with a mixture of methylene chloride (10 mL) and methanol (30 mL) 8 times, and dried under vacuum.

For the preparation of AG-MOP-TADS-Pd1, the same synthetic procedures as AG-MOP-TADS-Pd2 were applied except using  $(\text{PPh}_3)_4\text{Pd}$  (12 mg, 11  $\mu\text{mol}$ ). For the preparation of AG-MOP-TADS-Pd3, the same synthetic procedures as AG-MOP-TADS-Pd2 were applied except using  $(\text{PPh}_3)_4\text{Pd}$  (74 mg, 64  $\mu\text{mol}$ ). For the preparation of MOP-TADS-Pd2, the same synthetic procedures as AG-MOP-TADS-Pd2 were applied without AG. For the preparation of AG-Pd, the same synthetic procedures as AG-MOP-TADS-Pd2 were applied without tris(4-trimethylstannylphenyl)amine and 3,7-dibromodibenzothiophene sulfone.

### ***Experimental procedures of photocatalytic studies***

Catalysts (3.00 mg of AG-MOP-TADS-Pd1, AG-MOP-TADS-Pd2, and AG-MOP-TADS-Pd3, 2.69 mg of AG, 2.88 mg of AG-Pd, 0.31 mg of MOP-TADS-Pd2, a mixture of 2.69 mg AG and 0.31 mg MOP-TADS-Pd2), triethanolamine (TEOA, 0.80 mL), distilled water (7.2 mL), and a spin bar were added to a tube-type glassware under nitrogen. The glassware was completely sealed with a rubber septum and a insulating tape. After treating with sonication for 30 min, the mixture was bubbled with  $\text{N}_2$  gas for 15 min. The 1 mL of  $\text{N}_2$  was replaced with 1 mL methane (an internal standard) using a GC syringe. The reaction mixture was stirred at  $21 \pm 1$   $^{\circ}\text{C}$  under irradiation of a 300W Xe lamp (Luxtel Ceralux CL300BF). The temperature of reaction mixture was carefully maintained at 25  $^{\circ}\text{C}$  with a water bath using the circulated water. After every 1 h, the amount of the generated hydrogen gas was analyzed using a GC (Agilent 6890) equipment with a thermal conductivity detector (TCD). The TCD detector has a different sensitivities towards hydrogen and methane. Thus, the detection sensitivity of the GC equipment was calibrated by the average value obtained using the same amount of hydrogen and methane. For the recycle tests of AG-MOP-TADS-Pd2, after the photocatalytic reaction for 5 h, the reaction mixture was bubbled with  $\text{N}_2$  gas for 15 min to evacuate the generated hydrogen from the reaction mixture. After sealing with a rubber septum, the 1 mL of  $\text{N}_2$  was replaced with 1 mL methane (internal standard). Under irradiation, the gas was analyzed by GC (Agilent 6890). These procedures were repeated for the next run. The photocatalytic results were obtained through the statistical treatment of the five independent reactions. For the measurement of AQYs, a monochromatic light source was obtained using a band pass filter of 420 nm (420FS10-25). The AQYs were calculated based on the following equations.<sup>2</sup>  $\text{AQY}(\%) = (\text{number of reacted electrons} \times 100) / \text{number of incident photons} = (2 \times \text{number of H}_2 \text{ molecules} \times N_A \times h \times c \times 100) / (S \times P \times t \times \lambda)$ ;  $N_A$ : Avogadro constant,  $h$ : Planck constant,  $c$ : speed of light,  $S$ : area value,  $P$ : light intensity,  $t$ : time,  $\lambda$ : wavelength. In our study, the light intensity at 420 nm was 5.86  $\text{mW}/\text{cm}^2$ , respectively. The light intensities were measured by using a THORLABS PM100D. The irradiated area value was measured to be 7.73  $\text{cm}^2$ .

### ***Computational studies***

To investigate the photocatalytic process of AG-MOP-TADS-Pds, the density functional theory (DFT) calculations were carried out. We designed the model systems (M-1~5) of MOP-TADS (Fig. 7a in the text)

M-1~4 correspond to the gradually extended molecular structures in which the triphenylamine (TA) and dibenzothiophene sulfone (DS) moieties are alternatively connected with  $\pi$ -conjugation. On the other hand, M-5 represents a branched networking case. We tried to determine the ionization potentials of ground state (IP) and ionization potentials of excited state (IP\*) for the MOP-TADS. Especially IP\* value is the most significant factor which determines the possibility of photocatalytic proton reduction reaction. Firstly, the neutral and cationic ground states for M-1~5 model systems were optimized at the B3LYP/6-31G\* level. Then, the time-dependent density functional theory (TD-DFT) calculations were conducted to obtain the solution of the 1st excited state. The Tamm-Dancoff approximation (TDA) was used to reduce the instability of excited states in the calculations. For all DFT calculations regarding M-1~5, the Gaussian 16 program package was used.<sup>3</sup> The IP and IP\* were computed based on the following equation:

$$\text{IP} = E(\text{M}^+) - E(\text{M}), \text{IP}^* = E(\text{M}^+) - E(\text{M}^*) \quad (1)$$

Herein  $E(\text{M})$ ,  $E(\text{M}^+)$  and  $E(\text{M}^*)$  denote the self-consistent field (SCF) energies of fully optimized neutral ground state, cationic ground state, and the 1st excited state of M-1~5, respectively. Then, the calculated potential energies ( $\phi_{\text{vac}}$ ) relative to the vacuum level were converted to those values ( $\phi_{\text{NHE}}$ ) relative to the normal hydrogen electrode (NHE) potential by using the following equation.<sup>4</sup>

$$\phi_{\text{NHE}} = -4.85 - \phi_{\text{vac}} \quad (2)$$

The calculated IP and IP\* energy levels of M-1~5 were located at around 0.64 ~ 0.79 eV and -1.65 ~ -1.89 eV, respectively (Fig. 7b in text). We found that IP and IP\* were gradually converged to certain values for M-3~5 with increase in  $\pi$ -conjugation length. Thus, the representative values of IP and IP\* of MOP-TADS can be the average values for M-3~5, that is 0.68 eV and -1.87 eV, respectively. Consequently, the IP and IP\* on NHE potential scale were depicted in Fig. 7d in text.

To estimate the energy levels of electronic structure for afterglow (AG) materials on the scale of NHE potential, the bulk unit cell and surface slab model for  $\text{Sr}_4\text{Al}_{14}\text{O}_{25}$  having *Pmma* space group<sup>5</sup> were optimized at PBE/light tier-1 level of theory within a periodic boundary condition (PBC) using the FHI-aims code.<sup>6</sup> The  $3 \times 3 \times 3$  Monkhorst-Pack  $k$ -points meshes and the convergence criteria 0.02 eV/Å were used. With consideration of heavy metal atoms, the relativistic effects were treated at the zeroth order regular approximation (ZORA) level scale.<sup>7</sup> For the bulk unit cell, the geometrical optimizations of both nucleus positions and lattice parameters were conducted. The fully optimized lattice parameters of bulk unit cell for  $\text{Sr}_4\text{Al}_{14}\text{O}_{25}$  are  $a = 24.764$  Å,  $b = 8.514$  Å,  $c = 4.901$  Å and  $\alpha = \beta = \gamma = 90.000^\circ$  (Fig. S10). The surface slab model of  $\text{Sr}_4\text{Al}_{14}\text{O}_{25}$  was designed with  $1 \times 2 \times 2$  duplication of the optimized unit cell by cutting the facet with (010) plane. Then, along the z-axis a vacuum space of 20 Å was added to avoid spurious interaction between slab models in PBC. We also considered the slab models of (100) and (001) surfaces of  $\text{Sr}_4\text{Al}_{14}\text{O}_{25}$  possessing same number of atoms in the designed (010) surface. However, it was found that the slab model of (100) surface has much higher SCF energy than (010) surface by 50.05 eV, that indicates thermodynamic instability of (100) surface. And the geometrical optimization process of the slab model of (001) surface gets the severe convergence problem. Hence, it is notable that the DFT results of the slab models of (100) and (001) surfaces were omitted in this study.

To align the ionization potential of AG materials relative to NHE potential, firstly we determined the valence band maximum (VBM) level of bulk  $\text{Sr}_4\text{Al}_{14}\text{O}_{25}$ . However, normally the vacuum reference level

cannot be defined in PBC calculations especially for a bulk unit cell. To solve this problem, we added a He atom as a reference atom above the optimized (010) surface slab model with distance of 10 Å inducing no atomic interaction. Then, a single point calculation was carried out to obtain the density of state (DOS) at PBE/light-tier1 level relative to the energy level of 1s orbital of a He atom in vacuum level (-15.76 eV), as shown in Fig. S11 in the ESI. It should be noted that we tried to assign the VBM level of bulk Sr<sub>4</sub>Al<sub>14</sub>O<sub>25</sub> instead of that of (010) surface. Thus, the DOS of bulk unit cell was aligned to the DOS of (010) surface in vacuum level with consideration of matching the maximum peak near to VBM remarked as Peak<sub>max</sub> in Fig. S11 in the ESI. The partial density of state (pDOS) plots shows that the valence bands of bulk unit cell and (010) surface slab model are dominantly composed of O p-orbital state (Fig. S12 in the ESI). In other words, we used the Peak<sub>max</sub> positions of DOS consisting of O p-orbital states in valence bands to match the bulk DOS and surface DOS. Finally, we defined the position of VBM of bulk unit cell as -5.59 eV relative to a vacuum level.

Based on the Koopman's theorem, the negative VBM value of solid is approximately considered as the IP value relative to a vacuum level. Then, using equation (2) the estimated IP is adjusted to the scale of NHE potential shown as 0.74 eV in Fig. 7d in text. The position of excited state of Sr<sub>4</sub>Al<sub>14</sub>O<sub>25</sub> was estimated from the band gap value of bulk Sr<sub>4</sub>Al<sub>14</sub>O<sub>25</sub>. To estimate more reliable band gap value of bulk Sr<sub>4</sub>Al<sub>14</sub>O<sub>25</sub>, a single point calculation with B3LYP/light tier-1 level and 3×3×3 *k*-point mesh was performed based on the optimized structure at PBE/light-tier1 level. (Calc. 5.96 eV in Fig. 7d in text) According to previous theoretical study, it is known that the green luminescent of AG materials is originated in the doped Eu<sup>2+</sup> states.<sup>8</sup> Considering the experimentally observed energy range of photo-luminescent (PL), that is Expt. 2.08 eV ~ 3.09 eV, we finalized the schematic figure of photocatalytic mechanism including the optical transition from doped Eu<sup>2+</sup> states in Sr<sub>4</sub>Al<sub>14</sub>O<sub>25</sub>, as shown in Fig. 7d in text.

## Reference

- 1 a) A. Liang, M. Luo, Y. Liu, H. Wang, Z. Wang, X. Zheng, T. Cao, D. Liu, Y. Zhang and F. Huang, *Dyes Pigm.* 2018, **159**, 637-645. b) Z. -X. Zhao, Z. -L. Hu, X. -T. Zhang and Q. -X. Liu, *Tetrahedron* 2019, **75**, 130675. c) S. Paek, N. Cho, S. Cho, J. K. Lee and J. Ko, *Org. Lett.* 2012, **14**, 6326-6329.
- 2 J. Yu, S. Seo, Y. Luo, Y. Sun, S. Oh, C. T. K. Nguyen, C. Seo, J. -H. Kim, J. Kim and H. Lee, *ACS Nano* 2020, **14**, 1715-1726.
- 3 M. J. Frisch, et al. Gaussian 16, Revision B.01, Gaussian, Inc., Wallingford CT, 2016.
- 4 J. S. Filhol and M. Neurock, *Angew. Chem. Int. Ed. Engl.* 2006, **45**, 402-406.
- 5 The crystal structure of Sr<sub>4</sub>Al<sub>14</sub>O<sub>25</sub> was retrieved from the Materials Project Database. (<https://doi.org/10.17188/1267485>)
- 6 V. Blum, R. Gehrke, F. Hanke, P. Havu, V. Havu, X. Ren, K. Reuter and M. Scheffler, *Comput. Phys. Commun.* 2009, **180**, 2175- 2196.
- 7 E. V. Lenthe, E. J. Baerends and J. G. Snijders, *J. Chem. Phys.*, 1994, **101**, 9783-9792.
- 8 L. Ning, X. Huang, Y. Huang and P. A. Tanner, *J. Mater. Chem. C* 2018, **6**, 6637-6640.

**Fig. S1** (a) Pd and (b) AG amount dependent photocatalytic performance of MOP-TADS-Pd.

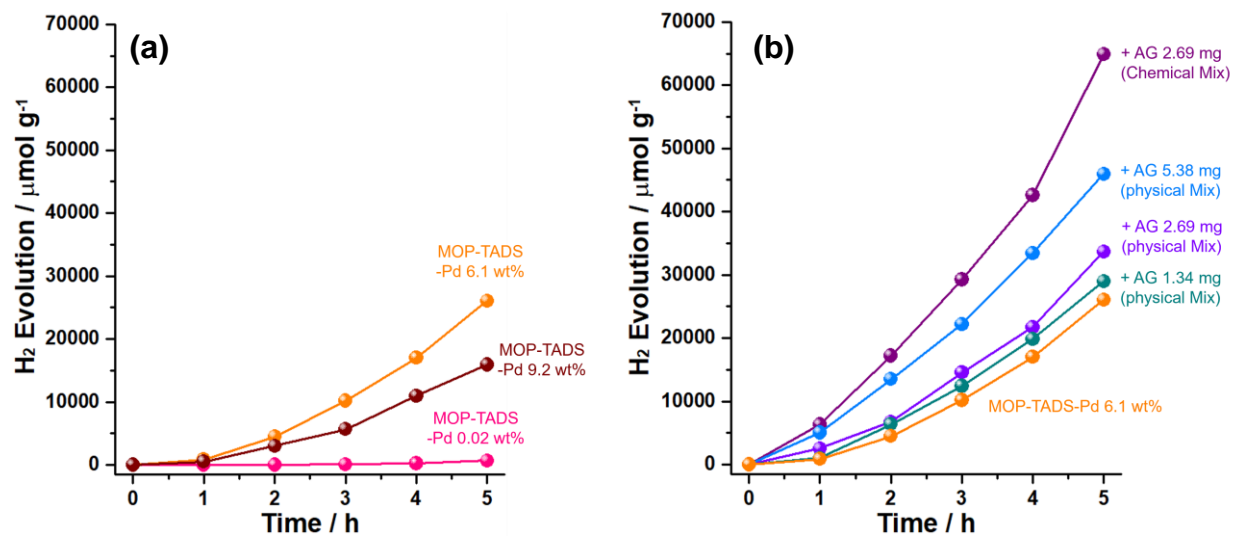

Fig. S2 Characterization data of AG-Pd: (a) PXRD pattern and XPS spectrum of AG-Pd.

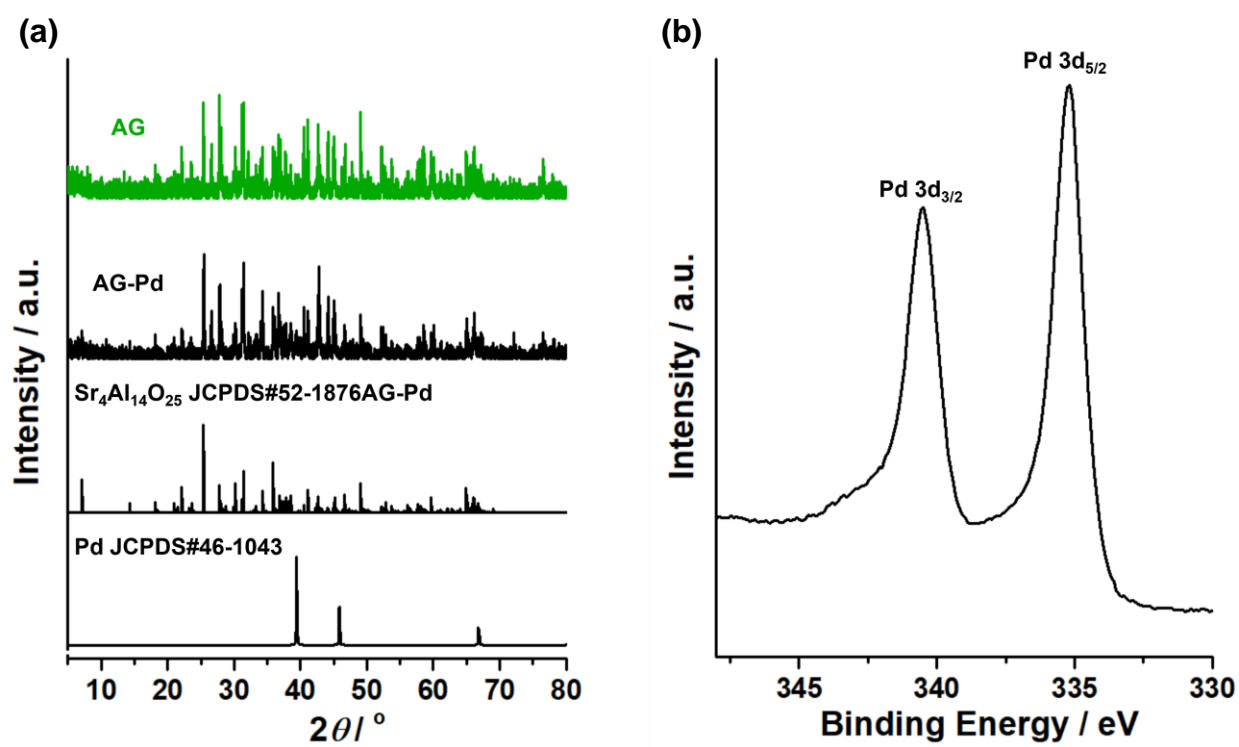

**Fig. S3** TEM and HR-TEM images of Pd nanoparticles on MOP-TADS.

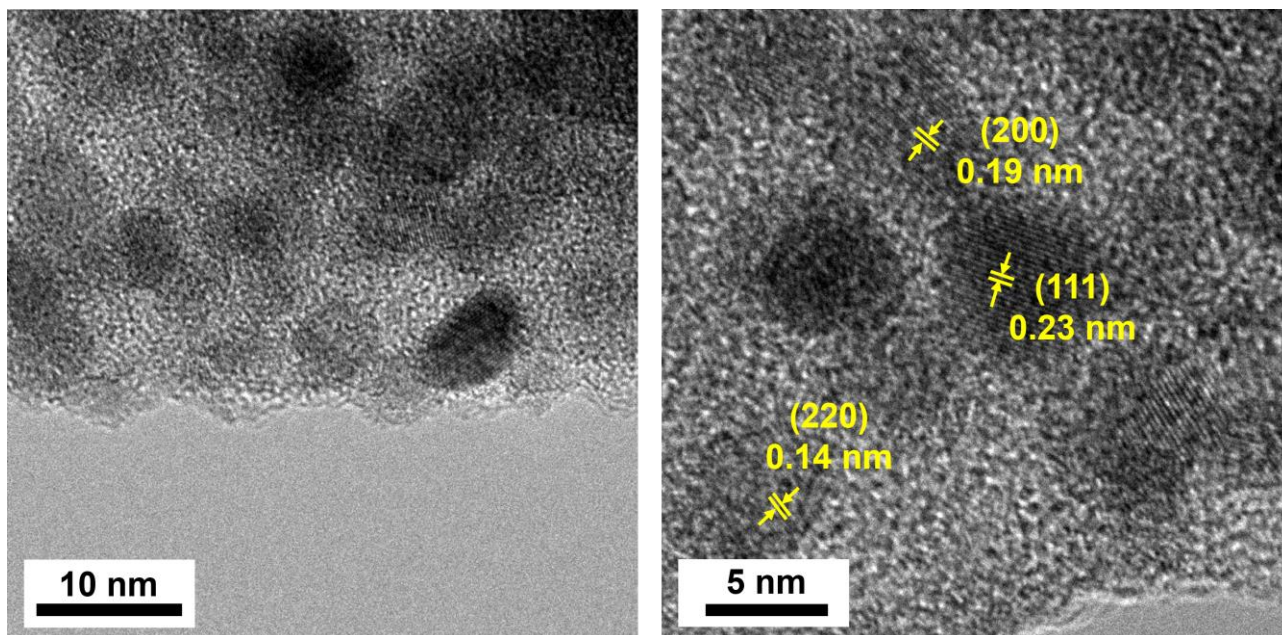

**Fig. S4** The PXRD pattern of MOP-TADS obtained through Pd etching from MOP-TADS-Pd2.

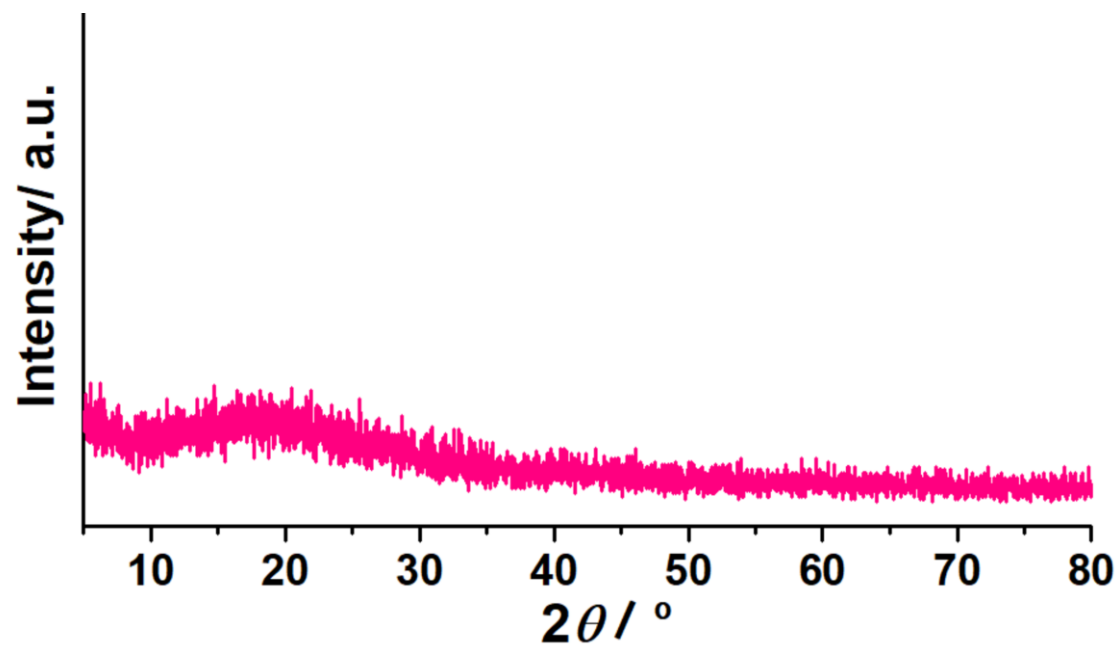



Fig. S5 XPS survey spectra of AG-MOP-TADS-Pds, MOP-TADS-Pd, and AG.

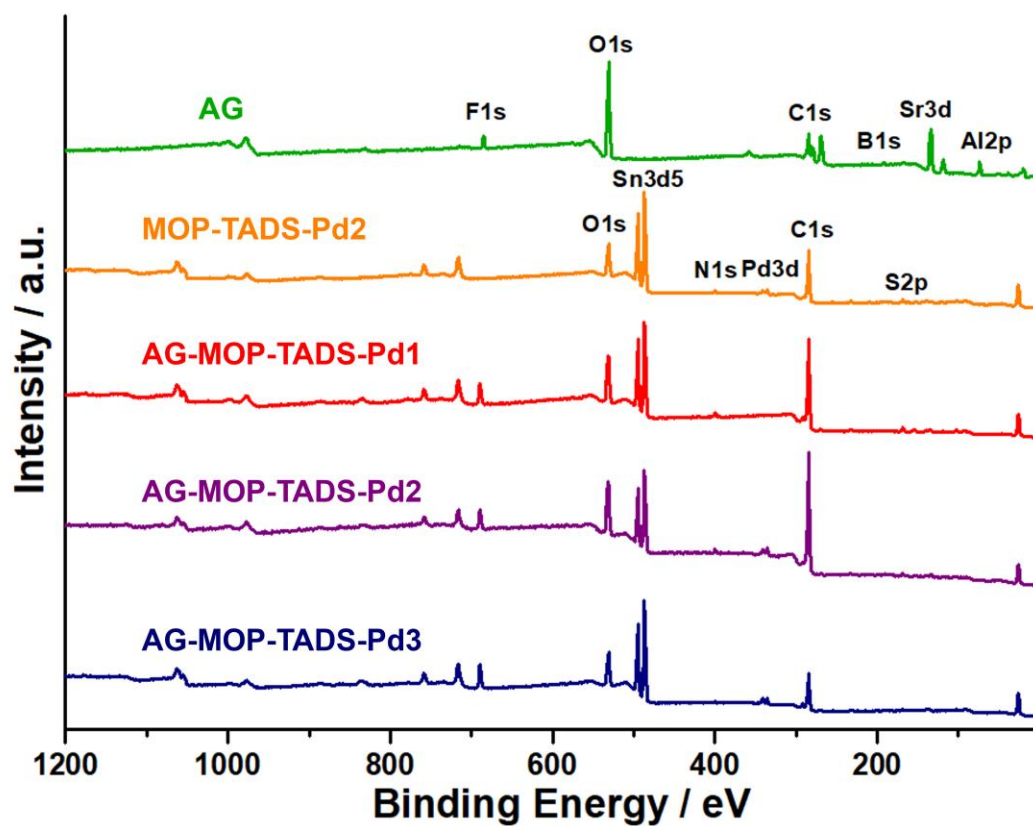

**Fig. S6** N<sub>2</sub> adsorption-desorption isotherm curves of MOP-TADS obtained through Pd etching from MOP-TADS-Pd2.

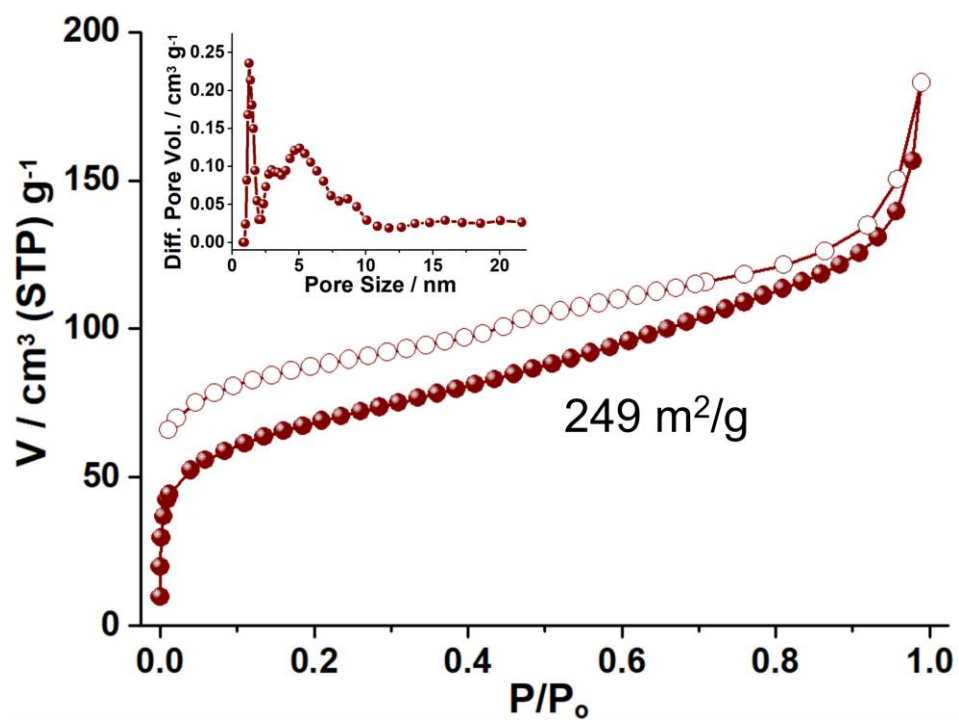

**Fig. S7** The analysis of emission lifetime of AG, AG-MOP-TADS-Pds, MOP-TADS-Pd2, and AG-Pd.

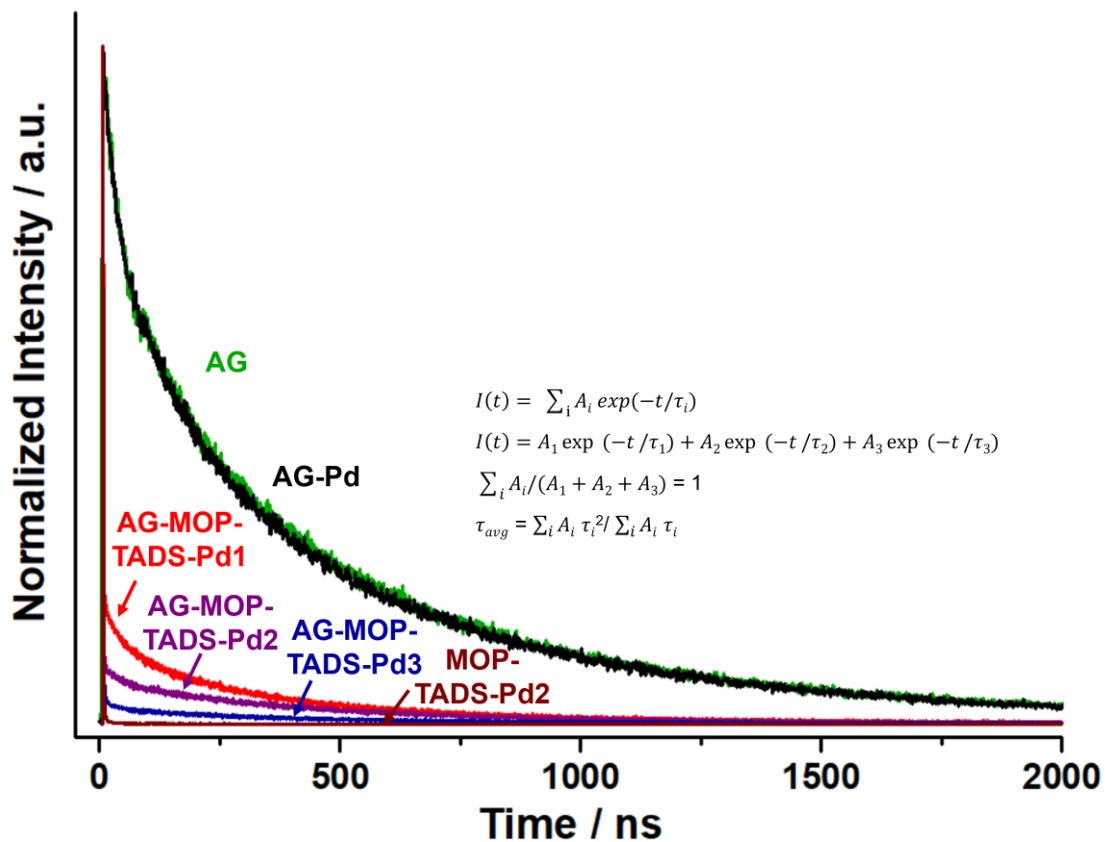

|                        | $\tau_1$<br>(ns) | $A_1$<br>(%) | $\tau_2$<br>(ns) | $A_2$<br>(%) | $\tau_3$<br>(ns) | $A_3$<br>(%) | $\tau_{avg}$<br>(ns) |
|------------------------|------------------|--------------|------------------|--------------|------------------|--------------|----------------------|
| <b>AG</b>              | 752              | 33           | 268              | 38           | 30               | 29           | 360                  |
| <b>AG-Pd</b>           | 727              | 36           | 242              | 37           | 35               | 27           | 362                  |
| <b>AG-MOP-TADS-Pd1</b> | 383              | 8.3          | 60               | 6.7          | 0.40             | 85           | 36                   |
| <b>AG-MOP-TADS-Pd2</b> | 446              | 4.9          | 33               | 2.5          | 0.37             | 93           | 23                   |
| <b>AG-MOP-TADS-Pd3</b> | 387              | 2.0          | 9.4              | 3.4          | 0.41             | 95           | 8.5                  |
| <b>MOP-TADS-Pd2</b>    | 37               | 0.16         | 3.1              | 6.2          | 0.39             | 94           | 0.62                 |

Fig. S8 (a) IR and (b) XPS spectra of AG-MOP-TADS-Pd2 before and after 5 recycle tests.

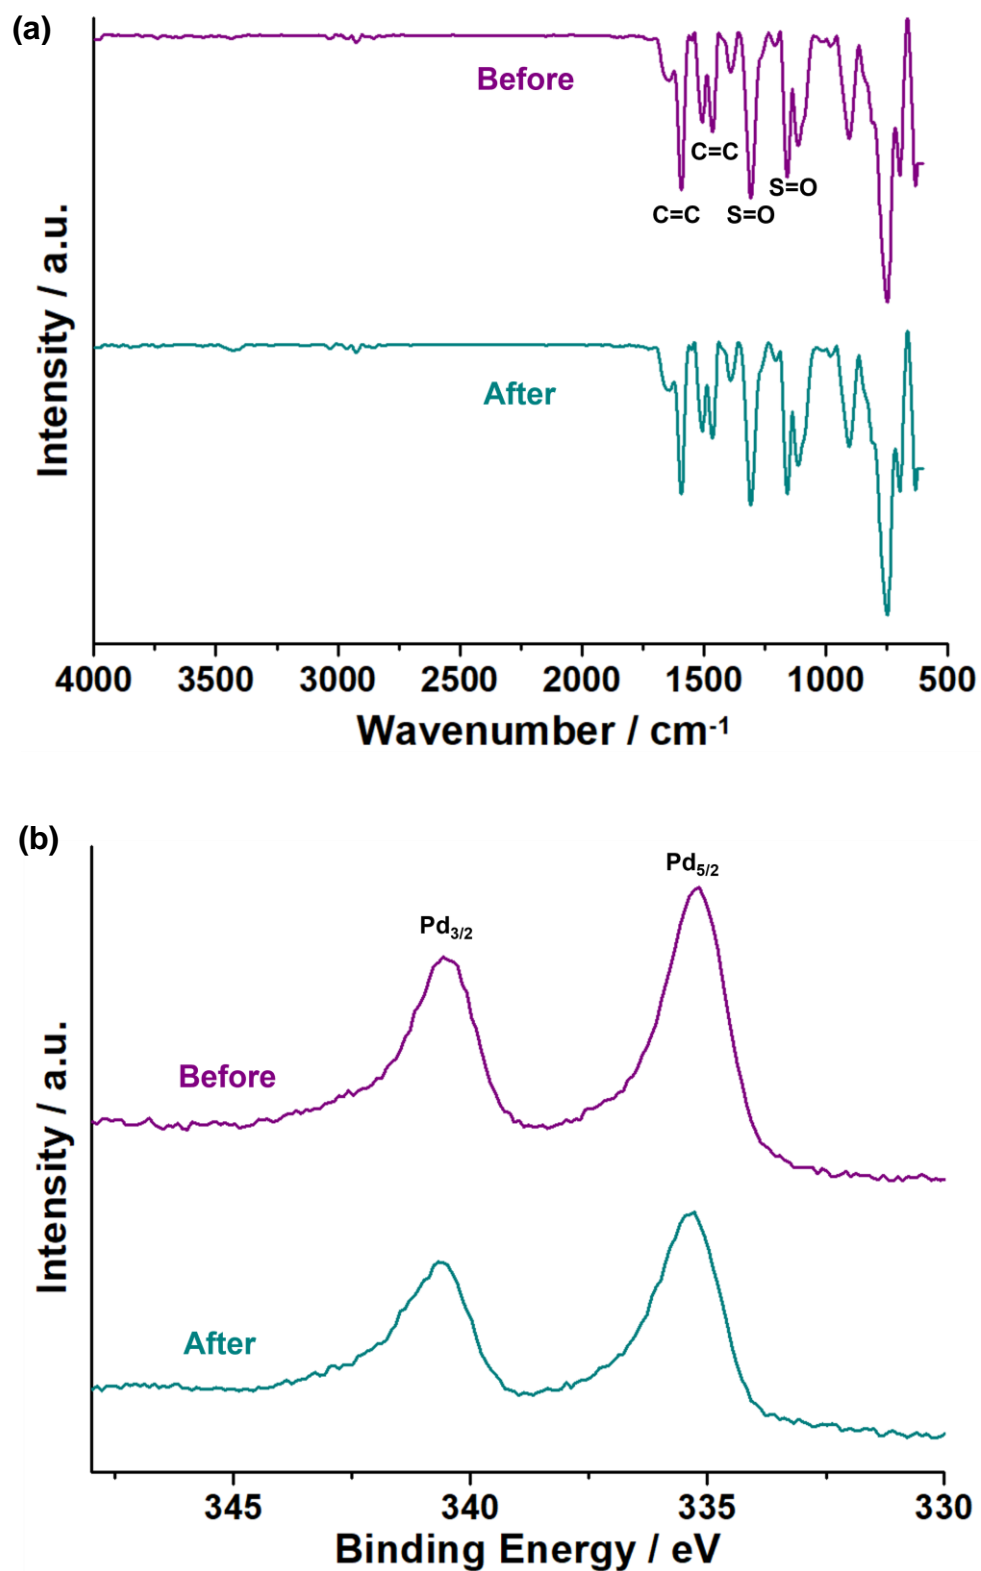

**Fig. S9** The optimized structures of bulk (up) and (010) surface slab model (down) of  $\text{Sr}_4\text{Al}_{14}\text{O}_{25}$ .

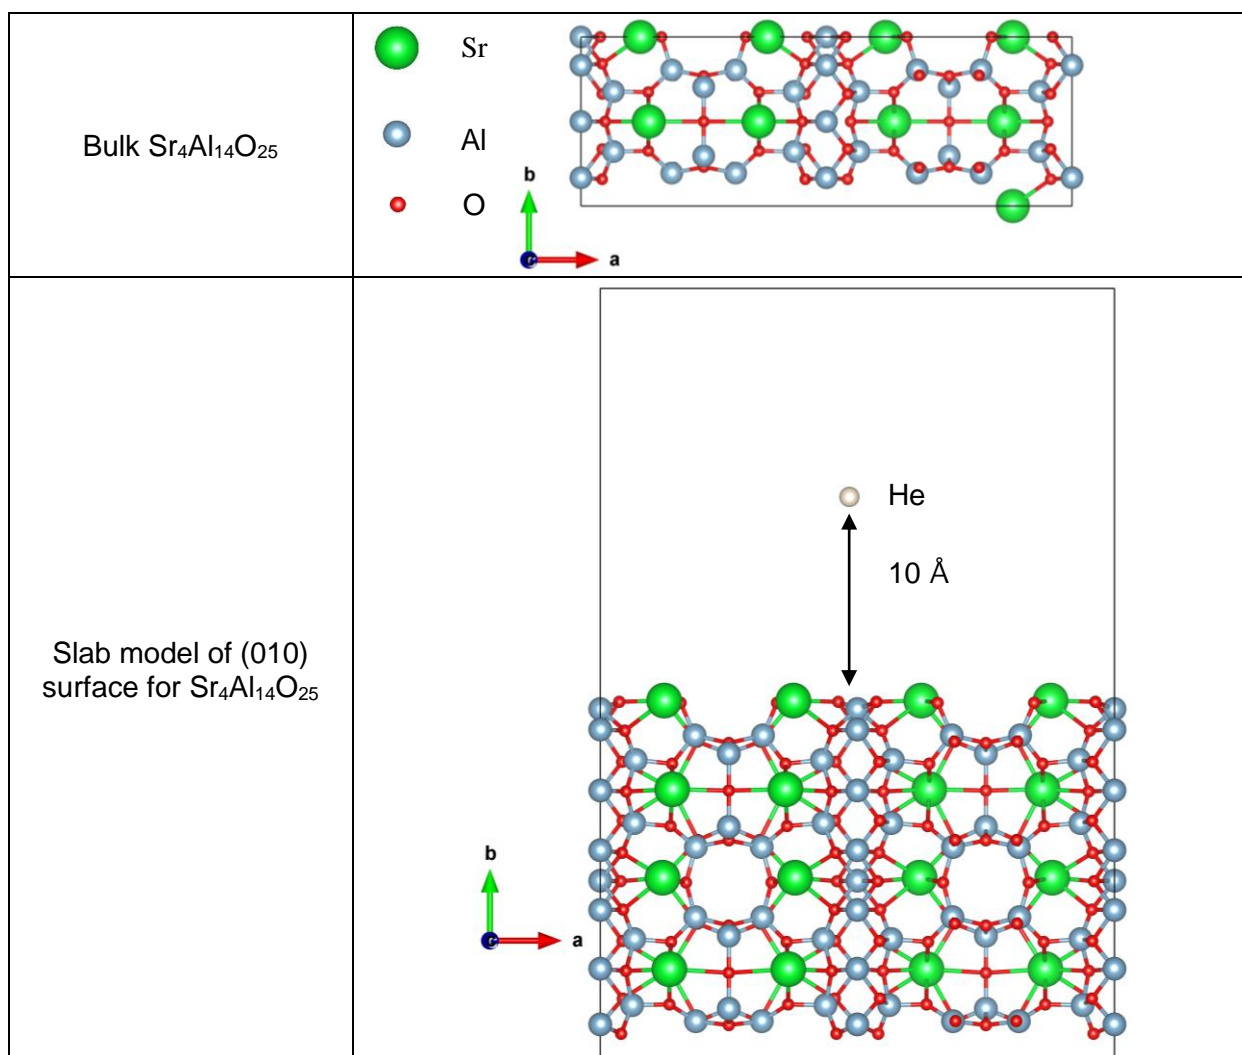

**Fig. S10** The valance band maximum (VBM) level of bulk  $\text{Sr}_4\text{Al}_{14}\text{O}_{25}$  estimated from the density of state (DOS) plots calculated at PBE/light-tier1 level in comparison of DOS plot of (010) surface slab model of  $\text{Sr}_4\text{Al}_{14}\text{O}_{25}$ .

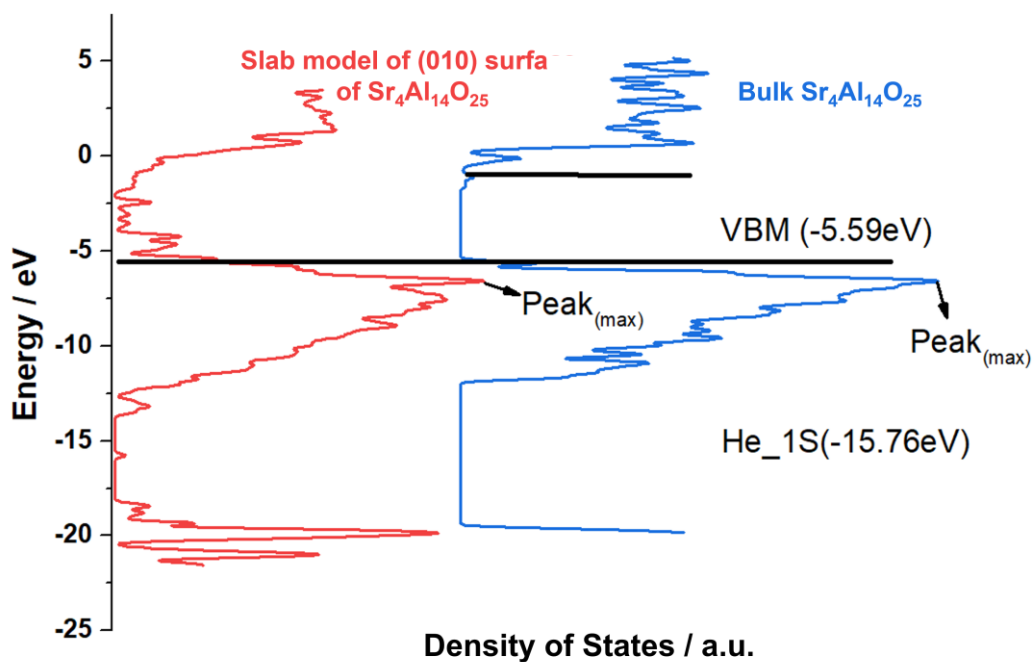

**Fig. S11** The calculated atom-projected and angular-momentum resolved partial density of state (p-DOS) plots for the bulk (a and b) and (010) surface slab (c and d) for  $\text{Sr}_4\text{Al}_{14}\text{O}_{25}$ .

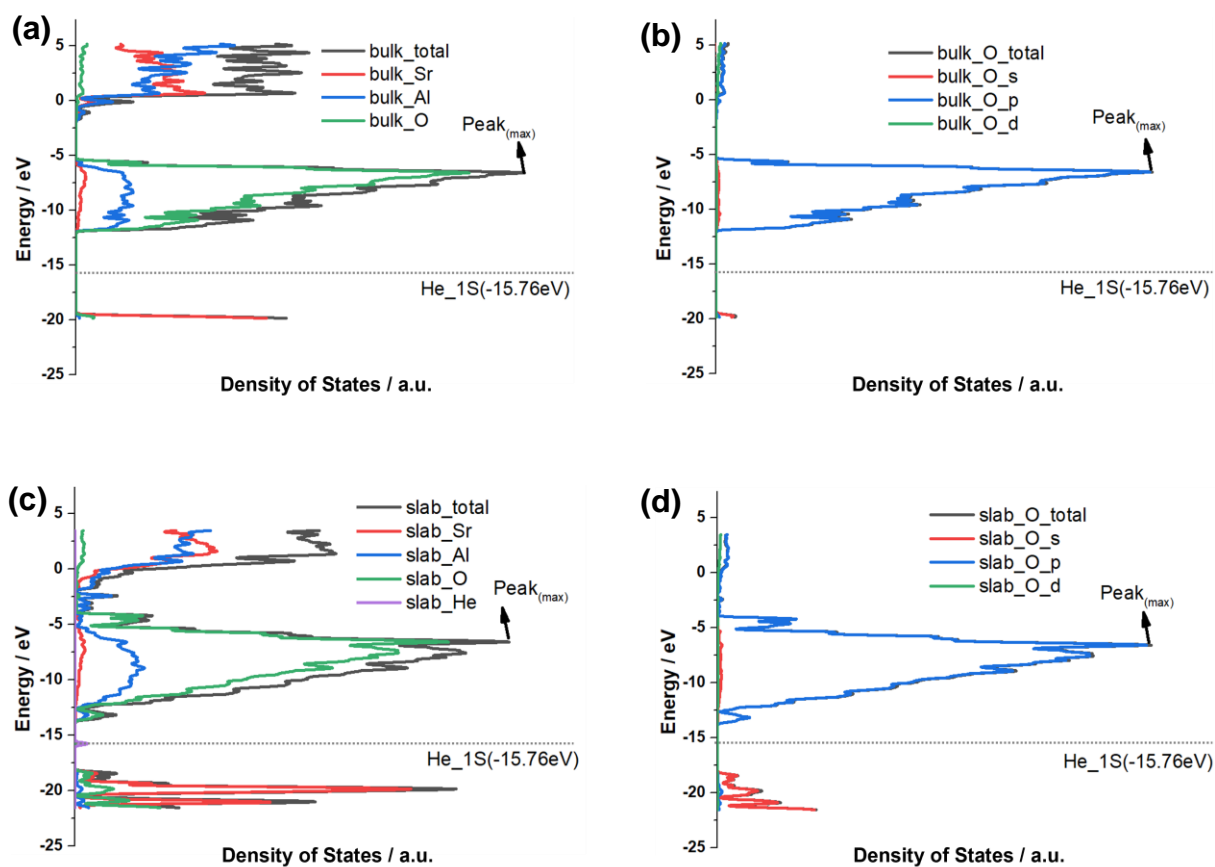

**Fig. S12** Cartesian coordinates (in Å) of optimized model systems (TA, DS, M-1~5 and Sr<sub>4</sub>Al<sub>14</sub>O<sub>25</sub>).

**TA**

N 0.00005900 -0.00005400 -0.00172700  
C 0.34575300 -1.37901500 -0.00064700  
C -0.35909000 -2.29199400 -0.80208500  
C 1.39764800 -1.85069100 0.80164200  
C -0.02237100 -3.64416200 -0.79093400  
H -1.16887000 -1.93500300 -1.43042900  
C 1.73891500 -3.20174900 0.79164300  
H 1.94301800 -1.15332400 1.42953500  
C 1.03025500 -4.10855000 0.00062800  
H -0.57930200 -4.33570100 -1.41794400  
H 2.55605700 -3.54814400 1.41921300  
H 1.29453600 -5.16218700 0.00108000  
C -1.36705100 0.39004300 -0.00068900  
C -2.30061300 -0.28244400 0.80479800  
C -1.80609500 1.45408900 -0.80544700  
C -3.64130800 0.09755600 0.79498900  
H -1.96848700 -1.10140100 1.43488200  
C -3.14544900 1.83866500 -0.79421100  
H -1.09259500 1.97456600 -1.43635600  
C -4.07301400 1.16202600 0.00077200  
H -4.34926600 -0.43478000 1.42502900  
H -3.46661800 2.66457400 -1.42370000  
H -5.11761500 1.46003600 0.00134600  
C 1.02130100 0.98904700 -0.00089900  
C 0.90440600 2.13487800 0.80284200  
C 2.16347200 0.83629700 -0.80382700  
C 1.90392200 3.10585600 0.79340300  
H 0.02831600 2.25764700 1.43163800  
C 3.16629900 1.80383800 -0.79211300  
H 2.25840800 -0.04273600 -1.43336400  
C 3.04295000 2.94642500 0.00130000  
H 1.79594200 3.98594600 1.42215000  
H 4.04306500 1.66819100 -1.42013900  
H 3.82341500 3.70198900 0.00215700

**DS**

C 2.98551700 -1.83299200 -0.00015000  
C 3.51150700 -0.53732100 -0.00015200  
C 2.65704200 0.57005400 -0.00010200  
C 1.29114400 0.33414700 -0.00005500  
C 0.73941600 -0.95460900 -0.00004900  
C 1.60532100 -2.05060200 -0.00009800  
H 3.65918800 -2.68520000 -0.00019000  
H 4.58717400 -0.38855800 -0.00018900  
H 3.04874900 1.58258500 -0.00010100  
H 1.21469900 -3.06409100 -0.00009100  
C -1.29114400 0.33414800 0.00006700  
C -2.65704200 0.57005500 0.00012600  
C -3.51150700 -0.53732000 0.00014100  
C -2.98551800 -1.83299100 0.00009100  
C -1.60532100 -2.05060200 0.00002900  
C -0.73941600 -0.95460800 0.00001600  
H -3.04874900 1.58258600 0.00016000  
H -4.58717400 -0.38855600 0.00019100  
H -3.65918900 -2.68519900 0.00009900  
H -1.21470000 -3.06409100 -0.00001100

S 0.00000000 1.58883500 0.00002400  
O 0.00006800 2.33404500 1.26810700  
O -0.00006700 2.33408100 -1.26803700

**M-1**

C 2.99096000 0.00451500 2.05364500  
C 3.54092300 0.00837400 0.75632600  
C 2.65275900 0.00812200 -0.33819700  
C 1.29174500 0.00809000 -0.09734900  
C 0.73683300 0.00168600 1.19055500  
C 1.61495200 -0.00143600 2.27730700  
H 3.66085600 0.03167900 2.90782500  
H 3.03107300 -0.01754500 -1.35523700  
H 1.23504800 0.00277300 3.29512700  
C -1.29174400 -0.00810200 -0.09734900  
C -2.65275800 -0.00813900 -0.33819600  
C -3.54092200 -0.00836800 0.75632700  
C -2.99095800 -0.00448300 2.05364600  
C -1.61495000 0.00147300 2.27730700  
C -0.73683100 -0.00167200 1.19055500  
H -3.03107200 0.01750900 -1.35523700  
H -3.66085400 -0.03162800 2.90782700  
H -1.23504600 -0.00271600 3.29512700  
S 0.00000000 -0.00002000 -1.35263400  
O -0.00628900 1.26758200 -2.09937100  
O 0.00628900 -1.26763900 -2.09934200  
C -5.00608300 -0.01300500 0.54302200  
C -5.58488100 -0.71341600 -0.52982900  
C -5.87399000 0.68349400 1.40191600  
C -6.95824700 -0.71450900 -0.74166400  
H -4.95125800 -1.28015200 -1.20641000  
C -7.24987300 0.67875200 1.20658400  
H -5.46557900 1.25452300 2.23116400  
C -7.81810000 -0.01894700 0.12630300  
H -7.37328300 -1.26207600 -1.58128200  
H -7.89318300 1.22546900 1.88803700  
N -9.21760500 -0.02051100 -0.08178300  
C -9.87019100 -1.19282000 -0.55984000  
C -9.98420200 1.15142900 0.17658100  
C -9.55608800 -2.45195400 -0.02448900  
C -10.84226300 -1.10310100 -1.56829000  
C -11.21764700 1.06027200 0.84037100  
C -9.52270600 2.41168100 -0.23548100  
C -10.19464700 -3.59603000 -0.49945200  
H -8.81169300 -2.52656700 0.76198700  
C -11.48901700 -2.25057200 -2.02378900  
H -11.08524900 -0.13267500 -1.98937100  
C -11.97351400 2.20676400 1.07819200  
H -11.57730200 0.08902600 1.16502000  
C -10.27685400 3.55467500 0.02339900  
H -8.57445100 2.48827100 -0.75807800  
C -11.16711500 -3.50336600 -1.49748700  
H -9.93934200 -4.56336000 -0.07480700  
H -12.23908400 -2.16396000 -2.80553400  
C -11.50758000 3.46050000 0.67674700  
H -12.92663200 2.11839800 1.59302100  
H -9.90508500 4.52245000 -0.30285600

H -11.66789600 -4.39635200 -1.86037800  
H -12.09635800 4.35270000 0.86969700  
C 5.00608400 0.01300900 0.54302100  
C 5.87399100 -0.68347500 1.40192800  
C 5.58488200 0.71340100 -0.52984200  
C 7.24987400 -0.67873500 1.20659700  
H 5.46558100 -1.25448900 2.23118600  
C 6.95824900 0.71449200 -0.74167700  
H 4.95125900 1.28012500 -1.20643300  
C 7.81810100 0.01894700 0.12630400  
H 7.89318500 -1.22543800 1.88806000  
H 7.37328500 1.26204600 -1.58130200  
N 9.21760700 0.02051200 -0.08177800  
C 9.98420600 -1.15142500 0.17658800  
C 9.87018800 1.19282100 -0.55984400  
C 9.52270200 -2.41168200 -0.23545000  
C 11.21766100 -1.06026200 0.84035900  
C 10.84225000 1.10310200 -1.56830400  
C 9.55608900 2.45195500 -0.02449000  
C 10.27685300 -3.55467400 0.02343300  
H 8.57444000 -2.48827900 -0.75803300  
C 11.97353000 -2.20675200 1.07818300  
H 11.57732300 -0.08901300 1.16499100  
C 11.48899600 2.25057400 -2.02381200  
H 11.08523300 0.13267600 -1.98938600  
C 10.19464000 3.59603200 -0.49946200  
H 8.81170200 2.52656700 0.76199300  
C 11.50758900 -3.46049300 0.67676100  
H 9.90507800 -4.52245300 -0.30280500  
H 12.92665600 -2.11838000 1.59299700  
C 11.16709800 3.50336800 -1.49750800  
H 12.23905500 2.16396200 -2.80556500  
H 9.93933900 4.56336200 -0.07481600  
H 12.09636900 -4.35269000 0.86971400  
H 11.66787400 4.39635400 -1.86040600

**M-2**

C -5.50816100 2.88680200 -2.08351100  
C -4.92450600 2.99291300 -0.80568900  
C -5.58608000 2.38109600 0.27780700  
C -6.76846000 1.70399800 0.04491500  
C -7.35615500 1.59432100 -1.22357900  
C -6.70391300 2.20319500 -2.29872500  
H -4.99731200 3.33045500 -2.93286800  
H -5.18716600 2.46154300 1.28413000  
H -7.11419900 2.13924300 -3.30259600  
C -8.97931000 0.36691000 0.05445300  
C -10.11644000 -0.38134700 0.29444600  
C -10.96494300 -0.70129700 -0.78485800  
C -10.60597400 -0.23981400 -2.06709500  
C -9.45160100 0.50863200 -2.29103900  
C -8.61360400 0.82589500 -1.21911600  
H -10.33802000 -0.73954500 1.29483800  
H -11.26240400 -0.45389300 -2.90513000  
H -9.21699100 0.84888800 -3.29575500  
S -7.76776600 0.86858800 1.28942200  
O -7.05600900 -0.30071000 1.82810600



O -8.35242800 1.84124900 2.22563000  
C -12.19395600 -1.49907700 -0.57286100  
C -12.95669200 -1.36747800 0.60077400  
C -12.64384200 -2.42074400 -1.53432900  
C -14.10537000 -2.12068500 0.81066000  
H -12.65445700 -0.65286600 1.36124900  
C -13.79805400 -3.16975700 -1.34042900  
H -12.07181500 -2.56845700 -2.44611600  
C -14.54966200 -3.03620700 -0.15959600  
H -14.66920100 -1.99858400 1.72939300  
H -14.11945500 -3.87219200 -2.10218300  
N -15.71972100 -3.80347400 0.04641200  
C -16.83955600 -3.24067400 0.72321400  
C -15.78765000 -5.14951700 -0.41463100  
C -17.28213200 -1.94476200 0.41455500  
C -17.52128700 -3.97974500 1.70243100  
C -16.94094900 -5.61912500 -1.06221100  
C -14.70872900 -6.02636700 -0.22014100  
C -18.37675900 -1.39901400 1.08260700  
H -16.76508500 -1.37186000 -0.34882800  
C -18.62622900 -3.43259000 2.35214100  
H -17.18065600 -4.98071800 1.94779600  
C -17.01205400 -6.94084400 -1.49857000  
H -17.77653100 -4.94408400 -1.21821400  
C -14.78196600 -7.34122300 -0.67639600  
H -13.81791300 -5.67203400 0.28898700  
C -19.05810600 -2.13911400 2.05128500  
H -18.70640200 -0.39408600 0.83223200  
H -19.14291500 -4.01798900 3.10814900  
C -15.93349100 -7.80839700 -1.31367300  
H -17.91243300 -7.28892500 -1.99799100  
H -13.93799800 -8.00735500 -0.51768200  
H -19.91514500 -1.71323100 2.56509200  
H -15.98986800 -8.83608000 -1.66096500  
C -3.65229600 3.72323900 -0.60144000  
C -2.69853000 3.27678700 0.32990800  
C -3.35235100 4.88883000 -1.32748300  
C -1.50649300 3.96183400 0.53363300  
H -2.88554200 2.37015900 0.89845200  
C -2.15724700 5.57368800 -1.14076500  
H -4.07321700 5.27799900 -2.04110600  
C -1.21388700 5.12193200 -0.20291100  
H -0.79157300 3.59598400 1.26336900  
H -1.95217600 6.47021600 -1.71661900  
N 0.00002200 5.82590400 -0.00003700  
C 1.21391500 5.12192400 0.20288500  
C 0.00001200 7.25168400 -0.00003700  
C 1.50645400 3.96172000 -0.53352000  
C 2.15733200 5.57375900 1.14064900  
C 0.98555400 7.96155800 -0.70286700  
C -0.98555800 7.96154000 0.70277500  
C 2.69848000 3.27666500 -0.32976700  
H 0.79149700 3.59579600 -1.26318300  
C 3.35242100 4.88888900 1.32739500  
H 1.95231400 6.47035800 1.71641100  
C 0.98694200 9.35530200 -0.69235500  
H 1.74534300 7.41609800 -1.25369600  
C -0.98698500 9.35528300 0.69224400

H -1.74533400 7.41606400 1.25360600  
C 3.65230600 3.72320000 0.60147700  
H 2.88544100 2.36996000 -0.89820700  
H 4.07333700 5.27811400 2.04093800  
C -0.00003000 10.06024000 -0.00005900  
H 1.75669300 9.89132700 -1.24118700  
H -1.75675300 9.89129600 1.24106400  
H -0.00004800 11.14645900 -0.00006600  
C 4.92452100 2.99288800 0.80573000  
C 5.58602900 2.38098000 -0.27775400  
C 5.50823600 2.88687900 2.08353600  
C 6.76842300 1.70390000 -0.04487000  
H 5.18704900 2.46134600 -1.28405600  
C 6.70400100 2.20329200 2.29873800  
H 4.99741900 3.33060000 2.93287600  
C 7.35618200 1.59433600 1.22360000  
S 7.76767400 0.86840400 -1.28936000  
H 7.11435100 2.13941300 3.30258800  
C 8.61364200 0.82592000 1.21913600  
C 8.97928100 0.36682800 -0.05441300  
O 8.35229000 1.84100400 -2.22566000  
O 7.05590700 -0.30093800 -1.82793300  
C 9.45170100 0.50875800 2.29104100  
C 10.11640300 -0.38144600 -0.29440300  
C 10.60606800 -0.23969600 2.06709900  
H 9.21714600 0.84910300 3.29573900  
C 10.96496600 -0.70129500 0.78488400  
H 10.33793000 -0.73973200 -1.29477400  
H 11.26255000 -0.45369400 2.90511300  
C 12.19397700 -1.49907900 0.57287700  
C 12.64392400 -2.42066900 1.53438900  
C 12.95663400 -1.36756200 -0.60081700  
C 13.79813000 -3.16968800 1.34047500  
H 12.07195200 -2.56831000 2.44622300  
C 14.10530100 -2.12078200 -0.81071900  
H 12.65434200 -0.65300700 -1.36132200  
C 14.54965700 -3.03622700 0.15958100  
H 14.11959300 -3.87206200 2.10226000  
H 14.66907900 -1.99875400 -1.72949400  
N 15.71971800 -3.80349300 -0.04645200  
C 15.78769900 -5.14951700 0.41462300  
C 16.83952500 -3.24064400 -0.72327000  
C 14.70871600 -6.02634800 0.22036700  
C 16.94110100 -5.61913900 1.06201300  
C 17.52120100 -3.97964300 -1.70257900  
C 17.28210400 -1.94475000 -0.41454900  
C 14.78199900 -7.34118700 0.67665900  
H 13.81781900 -5.67201500 -0.28861700  
C 17.01224400 -6.94084400 1.49841000  
H 17.77673000 -4.94412100 1.21784700  
C 18.62610000 -3.43243600 -2.35231700  
H 17.18055900 -4.98061000 -1.94799000  
C 18.37668900 -1.39894700 -1.08262700  
H 16.76509000 -1.37190400 0.34889900  
C 15.93362500 -7.80837400 1.31374400  
H 13.93798100 -8.00730000 0.51812400  
H 17.91270300 -7.28892900 1.99768100  
C 19.05798500 -2.13897700 -2.05139400

H 19.14274700 -4.01777500 -3.10839800  
H 18.70633900 -0.39403300 -0.83220500  
H 15.99003500 -8.83604500 1.66106500  
H 19.91499100 -1.71305300 -2.56522100

### M-3

C 13.23674700 -2.09726300 -1.24899100  
C 12.54595400 -2.17248600 -0.02337500  
C 12.62673900 -1.06971700 0.85051500  
C 13.36980300 0.03259300 0.47203800  
C 14.06200600 0.11428000 -0.74477400  
C 13.98645700 -0.97913600 -1.61128400  
H 13.16301700 -2.92698500 -1.94563100  
H 12.13377400 -1.09401400 1.81735300  
H 14.49689100 -0.96134400 -2.57012000  
C 14.63971300 2.26154500 0.16607400  
C 15.22251800 3.51389400 0.21566300  
C 16.01023900 3.94526800 -0.87088400  
C 16.16227900 3.07050500 -1.96522200  
C 15.56100300 1.81334300 -2.00061100  
C 14.78295200 1.38745400 -0.92114500  
H 15.05423800 4.16514100 1.06754100  
H 16.78783900 3.37609400 -2.79852900  
H 15.71078500 1.16930300 -2.86258900  
S 13.59968800 1.53232000 1.44307400  
O 12.33210300 2.26824300 1.56840400  
O 14.38513000 1.25301000 2.65525800  
C 16.65575000 5.27756300 -0.85722200  
C 17.15035000 5.83675300 0.33403700  
C 16.79664700 6.03567900 -2.03269100  
C 17.74818800 7.09094400 0.35615700  
H 17.07879700 5.27587600 1.26172500  
C 17.40433100 7.28530900 -2.02434500  
H 16.40916300 5.64922400 -2.97127000  
C 17.88831600 7.83935000 -0.82598200  
H 18.11556600 7.49576800 1.29317300  
H 17.49872300 7.84514200 -2.94883100  
N 18.49761800 9.11553000 -0.81080500  
C 19.59263400 9.37989600 0.06117100  
C 18.01328600 10.15417000 -1.65671700  
C 20.64137900 8.45568800 0.19028000  
C 19.64089300 10.57416900 0.79675800  
C 18.91168900 10.97158400 -2.35998800  
C 16.63453100 10.38126000 -1.79118900  
C 21.70791100 8.71971300 1.04770300  
H 20.61449100 7.53414700 -0.38279800  
C 20.72070000 10.83787200 1.63750800  
H 18.83037200 11.29013300 0.70426700  
C 18.43678200 11.99800200 -3.17441600  
H 19.97860500 10.79766000 -2.26219100  
C 16.16848600 11.39824200 -2.62245500  
H 15.93525800 9.75925400 -1.24128900  
C 21.75757200 9.91228800 1.77265000  
H 22.51159700 7.99349600 1.13687300  
H 20.74253100 11.76736900 2.20031200  
C 17.06451600 12.21521100 -3.31532200  
H 19.14568400 12.62238300 -3.71188400  
H 15.09794700 11.56119500 -2.71517900  
H 22.59410800 10.11773900 2.43437700

H 16.69786600 13.01196100 -3.95616400  
C 11.75572400 -3.37106500 0.34047400  
C 10.55832000 -3.26044700 1.06870000  
C 12.17322700 -4.66253500 -0.02532800  
C 9.81670400 -4.38132700 1.42264500  
H 10.19177900 -2.27869000 1.35483100  
C 11.43133300 -5.78880100 0.31106900  
H 13.10393700 -4.79222600 -0.57054900  
C 10.23973200 -5.66689400 1.04520600  
H 8.89971000 -4.26386200 1.99059600  
H 11.77773300 -6.77310500 0.01374600  
N 9.49015300 -6.81565500 1.40300200  
C 8.07296300 -6.78935600 1.38043800  
C 10.16750400 -8.00569500 1.80258400  
C 7.37904100 -6.12822300 0.35296400  
C 7.32816700 -7.43244700 2.38316400  
C 9.77717000 -9.25072700 1.28663300  
C 11.23061500 -7.94506900 2.71631300  
C 5.98942300 -6.10413300 0.33979600  
H 7.93480600 -5.62667600 -0.43251300  
C 5.93872500 -7.41430800 2.35315100  
H 7.84534800 -7.95362500 3.18200500  
C 10.43497700 -10.41253300 1.68706300  
H 8.95947400 -9.30035700 0.57434500  
C 11.89436500 -9.11007600 3.09719600  
H 11.53076300 -6.98443900 3.12315000  
C 5.23424300 -6.74713000 1.33607400  
H 5.48254600 -5.56291200 -0.45407800  
H 5.39104300 -7.94246000 3.12857900  
C 11.49857700 -10.34956300 2.58988200  
H 10.12168600 -11.36981400 1.27904000  
H 12.71608500 -9.04775500 3.80565000  
H 12.01347100 -11.25622000 2.89441300  
C 3.75362300 -6.72148400 1.31415100  
C 3.04835200 -6.76912000 0.09486800  
C 3.00859700 -6.64627500 2.50766400  
C 1.66657800 -6.73583700 0.11844100  
H 3.58054600 -6.85555800 -0.84729500  
C 1.61495000 -6.61865400 2.51220000  
H 3.53738100 -6.58169700 3.45387400  
C 0.91822900 -6.66194300 1.30201800  
S 0.58532400 -6.79594600 -1.32125100  
H 1.08096400 -6.55145500 3.45590700  
C -0.53713900 -6.63874000 1.07153400  
C -0.88548800 -6.70498100 -0.28509200  
O 0.67205100 -8.10702300 -1.98282100  
O 0.73000900 -5.57676100 -2.13149100  
C -1.57138200 -6.55851000 2.00726800  
C -2.19271600 -6.68921500 -0.73441900  
C -2.89587200 -6.54721300 1.57301200  
H -1.35290700 -6.51494200 3.07051400  
C -3.23799800 -6.60906900 0.20759800  
H -2.40916300 -6.71141800 -1.79787100  
H -3.68989800 -6.51334300 2.31285800  
C -4.65280000 -6.58907600 -0.22989400  
C -5.61570200 -5.81983500 0.44629700  
C -5.08422800 -7.33691000 -1.33939800  
C -6.94517000 -5.80031600 0.04162500

H -5.31856900 -5.21261400 1.29670000  
C -6.40866300 -7.31357400 -1.76045100  
H -4.37456800 -7.95937300 -1.87713000  
C -7.36355600 -6.54470600 -1.07429600  
H -7.66643900 -5.19970100 0.58613000  
H -6.71197300 -7.89846800 -2.62253100  
N -8.71688500 -6.52575900 -1.49549700  
C -9.46182900 -5.31960600 -1.46715300  
C -9.33410100 -7.72759400 -1.95173000  
C -8.87381500 -4.10003100 -1.84264900  
C -10.80885000 -5.31715600 -1.06846900  
C -10.11493000 -7.72578600 -3.11758700  
C -9.16832600 -8.92554000 -1.24030700  
C -9.60896900 -2.92086800 -1.80870600  
H -7.83448600 -4.07966100 -2.15399100  
C -11.53904100 -4.13458700 -1.05085000  
H -11.28290300 -6.24923000 -0.77898200  
C -10.72432900 -8.90047300 -3.55492100  
H -10.24015700 -6.80257300 -3.67466900  
C -9.76650000 -10.09935400 -1.69534600  
H -8.57095300 -8.92955100 -0.33394400  
C -10.95856700 -2.90731400 -1.41594900  
H -9.11865700 -1.99003600 -2.07956600  
H -12.58510000 -4.16917800 -0.75965400  
C -10.55076000 -10.09387500 -2.85079800  
H -11.32648600 -8.88341800 -4.45942200  
H -9.62895100 -11.01960800 -1.13389800  
H -11.02129000 -11.00906000 -3.19839600  
C -11.73969300 -1.64939000 -1.38504200  
C -12.70819900 -1.42687100 -0.38573700  
C -11.54008700 -0.64192000 -2.34942700  
C -13.41879500 -0.24124400 -0.39312100  
H -12.87622700 -2.16348700 0.39368700  
C -12.26291500 0.55008500 -2.33798500  
H -10.81679000 -0.80848800 -3.14209300  
C -13.22429500 0.76730700 -1.34773600  
S -14.68592700 0.23556000 0.79513700  
H -12.08050400 1.29715000 -3.10535300  
C -14.09544000 1.93840800 -1.14440900  
C -14.93844900 1.81652700 -0.03038800  
O -14.10039600 0.43328600 2.13012000  
O -15.87415300 -0.62075200 0.65712200  
C -14.17929600 3.11086200 -1.89958100  
C -15.84066200 2.79245900 0.34945700  
C -15.07964300 4.10825300 -1.52855200  
H -13.54119700 3.25716800 -2.76656200  
C -15.92489600 3.97792500 -0.40863200  
H -16.49191300 2.63721700 1.20387000  
H -15.11327600 5.02634000 -2.10736400  
C -16.87270700 5.05178900 -0.03395500  
C -17.52803400 5.82362800 -1.00908100  
C -17.15300700 5.34009700 1.31322400  
C -18.41261400 6.83737400 -0.66130500  
H -17.35553900 5.61856400 -2.06201200  
C -18.04487800 6.34343300 1.67195000  
H -16.65411200 4.77872800 2.09828400  
C -18.68962500 7.11480100 0.68897600  
H -18.90059000 7.41709000 -1.43774800

H -18.24179600 6.53980400 2.72058300  
N -19.59237000 8.14264600 1.04888000  
C -20.75726500 8.38279100 0.26533300  
C -19.34383500 8.94802500 2.19705200  
C -21.54681900 7.31293400 -0.18490600  
C -21.13565600 9.69476300 -0.05970400  
C -20.38582400 9.25867100 3.08466800  
C -18.05751100 9.44892000 2.45236800  
C -22.68363500 7.55472800 -0.95402700  
H -21.26484700 6.29669100 0.07204900  
C -22.28421100 9.92758900 -0.81405200  
H -20.52685200 10.52536200 0.28332200  
C -20.14292700 10.05933400 4.19924000  
H -21.38145800 8.87040800 2.89488300  
C -17.82024500 10.23314400 3.57973800  
H -17.24971100 9.22023800 1.76432900  
C -23.06221200 8.86133800 -1.27002500  
H -23.28426900 6.71539200 -1.29459100  
H -22.56352800 10.94947500 -1.05693400  
C -18.86020700 10.54722700 4.45727200  
H -20.96061000 10.29039900 4.87690200  
H -16.81836300 10.61230700 3.76324800  
H -23.95318000 9.04617200 -1.86327400  
H -18.67337200 11.16470200 5.33117600

## M-4

C -18.55011200 1.52011300 0.52776500  
C -17.81055400 1.48794900 -0.67085900  
C -17.33635900 2.70915100 -1.19004400  
C -17.61051900 3.87912800 -0.50696400  
C -18.34703200 3.92004100 0.68565100  
C -18.82046600 2.71068700 1.20088900  
H -18.90029600 0.58483800 0.95424500  
H -16.78675200 2.73450200 -2.12573300  
H -19.38874100 2.68872700 2.12649200  
C -17.90955300 6.26879200 0.42782000  
C -17.93648700 7.61545500 0.73809900  
C -18.60543200 8.03482300 1.90580500  
C -19.21489000 7.04982500 2.70842200  
C -19.17216300 5.69510200 2.38262700  
C -18.51217200 5.28274600 1.22225600  
H -17.42843700 8.33595600 0.10497300  
H -19.75688800 7.35869500 3.59720200  
H -19.66222300 4.97072900 3.02714400  
S -17.10788400 5.53467300 -1.00827900  
O -15.64666300 5.68206200 -0.92349000  
O -17.79440900 5.93360000 -2.24675200  
C -18.66484800 9.46801400 2.27216900  
C -18.76858600 10.46852000 1.28991100  
C -18.61903900 9.88348500 3.61432500  
C -18.81838400 11.81584300 1.62613900  
H -18.82532700 10.18913200 0.24151700  
C -18.68027800 11.22744600 3.96238200  
H -18.51790600 9.14314000 4.40310000  
C -18.77802100 12.22066900 2.97196400  
H -18.89502500 12.56382200 0.84412300  
H -18.64426700 11.51642000 5.00748600  
N -18.83352000 13.59044400 3.32060100  
C -19.64935700 14.48972800 2.57605600

|                |             |             |                |              |             |               |             |             |
|----------------|-------------|-------------|----------------|--------------|-------------|---------------|-------------|-------------|
| C -18.06849500 | 14.08427600 | 4.41594500  | C -9.38210800  | -6.34699500  | -4.16921600 | C 7.40288000  | -7.32571900 | 3.07790200  |
| C -20.95433100 | 14.12869300 | 2.20515300  | H -10.93219400 | -5.18664800  | -5.08519300 | C 8.34066900  | -7.40442900 | 2.03835500  |
| C -19.16117700 | 15.75373800 | 2.21017900  | C -8.98811000  | -7.06559000  | -3.03774900 | O 7.49081600  | -7.41283900 | -0.52290200 |
| C -18.64110700 | 14.97617900 | 5.33606600  | S -9.21133700  | -8.14933600  | -0.63202600 | O 8.37124800  | -9.58375000 | 0.44656800  |
| C -16.73093600 | 13.69332900 | 4.58562800  | H -8.70715900  | -6.22862500  | -5.01213400 | C 7.78113100  | -6.66372200 | 4.24860500  |
| C -21.74596800 | 15.01142300 | 1.47276500  | C -7.71185900  | -7.75579700  | -2.77869700 | C 9.61074400  | -6.86460800 | 2.11946200  |
| H -21.34135100 | 13.15620300 | 2.49288600  | C -7.66998100  | -8.39513500  | -1.53136200 | C 9.05634200  | -6.10937900 | 4.34685200  |
| C -19.96684900 | 16.63692800 | 1.49371200  | O -9.93622000  | -9.42118700  | -0.48725900 | H 7.08720800  | -6.56846300 | 5.07900600  |
| H -18.15164400 | 16.03690000 | 2.49084400  | O -8.99284500  | -7.31296800  | 0.55817600  | C 9.99400200  | -6.19477500 | 3.29868700  |
| C -17.88610800 | 15.46879400 | 6.39894200  | C -6.58144700  | -7.84428400  | -3.59497600 | H 10.31048700 | -6.97895200 | 1.29752200  |
| H -19.67586800 | 15.27923400 | 5.21121100  | C -6.57196200  | -9.10139800  | -1.07696200 | H 9.32763800  | -5.57388000 | 5.25175300  |
| C -15.98936800 | 14.17692200 | 5.66196900  | C -5.46610800  | -8.55544900  | -3.15489100 | C 11.34413600 | -5.60030300 | 3.42918300  |
| H -16.27943900 | 13.01234600 | 3.87100300  | H -6.56724900  | -7.37266400  | -4.57350600 | C 12.03465200 | -5.61847500 | 4.65338700  |
| C -21.26061400 | 16.27128000 | 1.11605600  | C -5.43189900  | -9.19486100  | -1.90001100 | C 11.98578100 | -4.99860400 | 2.33257800  |
| H -22.75369600 | 14.71577200 | 1.19293100  | H -6.57884900  | -9.55473200  | -0.09065700 | C 13.29988200 | -5.05784100 | 4.78252500  |
| H -19.57335000 | 17.61177300 | 1.21793300  | H -4.60485000  | -8.63968900  | -3.81086100 | H 11.58148500 | -6.09421500 | 5.51863200  |
| C -16.55917900 | 15.06961800 | 6.57234900  | C -4.23524300  | -9.94536700  | -1.45441900 | C 13.25602800 | -4.44625000 | 2.44820100  |
| H -18.34430300 | 16.15883600 | 7.10262700  | C -2.93764500  | -9.50383600  | -1.76642900 | H 11.47873600 | -4.95053000 | 1.37293400  |
| H -14.95498800 | 13.86452200 | 5.77883300  | C -4.35504600  | -11.12716600 | -0.70268800 | C 13.93395200 | -4.46281100 | 3.67888200  |
| H -21.88287400 | 16.95961100 | 0.55137800  | C -1.81254100  | -10.20835900 | -1.35428100 | H 13.80916300 | -5.08666700 | 5.74016000  |
| H -15.97590400 | 15.45050200 | 7.40579900  | H -2.80370300  | -8.58474200  | -2.33007000 | H 13.72869500 | -3.99402500 | 1.58253500  |
| C -17.53607200 | 0.21104700  | -1.36943400 | C -3.23585100  | -11.83233800 | -0.27560300 | N 15.23007800 | -3.90322100 | 3.80476700  |
| C -16.31139000 | -0.01223500 | -2.02247600 | H -5.34152900  | -11.51094400 | -0.45814400 | C 16.20909500 | -4.56387300 | 4.60515000  |
| C -18.48946300 | -0.82108200 | -1.40902500 | C -1.94392300  | -11.38405300 | -0.59653400 | C 15.56229500 | -2.69568900 | 3.14207700  |
| C -16.05155300 | -1.20331600 | -2.68998900 | H -0.82284600  | -9.84596800  | -1.61267200 | C 16.40148800 | -5.94883200 | 4.48960600  |
| H -15.54204100 | 0.75439700  | -1.99923700 | H -3.35769200  | -12.74096900 | 0.30483200  | C 16.98959300 | -3.83649300 | 5.51639000  |
| C -18.23441200 | -2.02089500 | -2.06312100 | N -0.79970200  | -12.10544800 | -0.17050100 | C 16.83088400 | -2.51964100 | 2.56437100  |
| H -19.45570500 | -0.67784900 | -0.93343100 | C 0.34599500   | -11.41807200 | 0.30317000  | C 14.63673000 | -1.64182000 | 3.05536100  |
| C -17.00969500 | -2.23039200 | -2.71862000 | C -0.80768300  | -13.53079500 | -0.20861600 | C 17.35197700 | -6.59246600 | 5.28014200  |
| H -15.09921300 | -1.34527200 | -3.19034100 | C 0.21783100   | -10.27633300 | 1.11209000  | H 15.80468000 | -6.51328400 | 3.77998300  |
| H -18.98878900 | -2.80074500 | -2.07766800 | C 1.63761400   | -11.86674900 | -0.01957500 | C 17.95049300 | -4.48577200 | 6.28959800  |
| N -16.75069000 | -3.44665400 | -3.39957200 | C -0.32781700  | -14.27355600 | 0.88086200  | H 16.83912100 | -2.76576500 | 5.61269800  |
| C -15.46580700 | -4.04345900 | -3.33690900 | C -1.29746300  | -14.20716000 | -1.33623400 | C 17.15958400 | -1.32790600 | 1.92963200  |
| C -17.78267300 | -4.06818300 | -4.16162000 | C 1.34502600   | -9.60680800  | 1.57341300  | H 17.55445300 | -3.32707300 | 2.60628800  |
| C -14.74555100 | -4.07675500 | -2.13115100 | H -0.77069700  | -9.91260400  | 1.37277300  | C 14.96990900 | -0.46021500 | 2.40429900  |
| C -14.88672000 | -4.62216400 | -4.47838500 | C 2.75859000   | -11.19735400 | 0.45741200  | H 13.65928900 | -1.74880000 | 3.51437300  |
| C -17.99549400 | -5.45232500 | -4.07051600 | H 1.75787900   | -12.74872600 | -0.64002500 | C 18.13427900 | -5.86583900 | 6.18028700  |
| C -18.59681300 | -3.30472700 | -5.01238200 | C -0.33076000  | -15.66652200 | 0.83497100  | H 17.49035400 | -7.66563900 | 5.17962400  |
| C -13.48653100 | -4.66312300 | -2.07542700 | H 0.04478900   | -13.75423600 | 1.75821000  | H 18.54861100 | -3.90974100 | 6.99058900  |
| H -15.17607200 | -3.63532600 | -1.23819600 | C -1.31377200  | -15.60048400 | -1.36553500 | C 16.23868600 | -0.27013300 | 1.82908900  |
| C -13.63169300 | -5.21601300 | -4.40991600 | H -1.66268300  | -13.63594300 | -2.18395500 | H 18.13806500 | -1.23408500 | 1.46698200  |
| H -15.43013900 | -4.61105700 | -5.41755200 | C 2.64199600   | -10.05076600 | 1.26245800  | H 14.24430100 | 0.34813400  | 2.38330100  |
| C -18.99882700 | -6.05841200 | -4.82446900 | H 1.21306800   | -8.71289900  | 2.17658400  | H 18.87962200 | -6.36921700 | 6.78930900  |
| H -17.37263600 | -6.04577400 | -3.40857100 | H 3.74371300   | -11.58297800 | 0.21020100  | C 16.59373700 | 0.99541500  | 1.14840100  |
| C -19.60978100 | -3.91699900 | -5.74839200 | C -0.82711400  | -16.33818800 | -0.28426500 | C 17.90117900 | 1.51560300  | 1.22930400  |
| H -18.43073300 | -2.23498200 | -5.09231400 | H 0.04435700   | -16.22833200 | 1.68624000  | C 15.63952100 | 1.71582100  | 0.40281700  |
| C -12.89956900 | -5.24870800 | -3.21057100 | H -1.69639100  | -16.11039200 | -2.24563700 | C 18.19300900 | 2.69908000  | 0.57747500  |
| H -12.94422000 | -4.65392500 | -1.13410100 | H -0.83455300  | -17.42394200 | -0.31350100 | H 18.66076400 | 1.00933400  | 1.81659500  |
| H -13.21941900 | -5.67701200 | -5.30315800 | C 3.84002300   | -9.34002400  | 1.76565900  | C 15.95065800 | 2.91148000  | -0.24281400 |
| C -19.81437300 | -5.29583600 | -5.66331200 | C 5.00022900   | -9.22962400  | 0.97333500  | H 14.63517000 | 1.31424000  | 0.30725600  |
| H -19.15145900 | -7.13133300 | -4.74322300 | C 3.85554400   | -8.75730300  | 3.04836600  | C 17.24809100 | 3.42385800  | -0.16312700 |
| H -20.23220900 | -3.31252000 | -6.40279500 | C 6.09883300   | -8.56341800  | 1.48357200  | S 19.79166700 | 3.52951800  | 0.56506000  |
| H -20.60004300 | -5.77051100 | -6.24404400 | H 5.02265000   | -9.63912200  | -0.03165400 | H 15.18508300 | 3.43050000  | -0.81264600 |
| C -11.56002200 | -5.87713600 | -3.14304200 | C 4.97142500   | -8.08528800  | 3.54458100  | C 17.79471800 | 4.65564900  | -0.75917700 |
| C -11.16167300 | -6.60467900 | -2.00389800 | H 2.97846100   | -8.85632300  | 3.68080000  | C 19.14902900 | 4.86343500  | -0.46065500 |
| C -10.64841400 | -5.76542000 | -4.21124800 | C 6.12176600   | -7.98040000  | 2.75870700  | O 20.78423200 | 2.73402200  | -0.17395800 |
| C -9.90147900  | -7.17248800 | -1.97908100 | S 7.66577500   | -8.30643200  | 0.63248500  | O 20.13133000 | 4.02443600  | 1.90821200  |
| H -11.84288500 | -6.73955100 | -1.16955000 | H 4.94247500   | -7.65742500  | 4.54269200  | C 17.15038400 | 5.60603300  | -1.55514700 |

|               |             |             |               |              |             |               |             |             |
|---------------|-------------|-------------|---------------|--------------|-------------|---------------|-------------|-------------|
| C 19.86915500 | 5.95134400  | -0.91700700 | S 1.67987500  | -8.68469700  | 1.19610600  | H -0.88019000 | 2.50669000  | -1.84142700 |
| C 17.85830600 | 6.71405200  | -2.01760500 | O 2.99614200  | -8.39930200  | 1.78762800  | C -3.83839700 | 0.63000200  | -0.20617700 |
| H 16.09927600 | 5.49558000  | -1.80663500 | O 0.52073800  | -8.85929700  | 2.08472500  | H -2.38016500 | -0.79659000 | 0.46568300  |
| C 19.22070600 | 6.91440900  | -1.71691900 | C 2.42934100  | -13.73051400 | -0.43150600 | C 3.10766000  | 2.91412500  | 0.20334800  |
| H 20.92472500 | 6.04834500  | -0.68378400 | C 1.98482900  | -14.34852400 | 0.75062900  | H 4.17524500  | 1.68235900  | -1.21513100 |
| H 17.33570900 | 7.46033300  | -2.60826900 | C 3.16877700  | -14.51756600 | -1.33156300 | H 1.73019900  | 3.89738000  | 1.54614100  |
| C 19.95098100 | 8.09832500  | -2.22080900 | C 2.26628800  | -15.68118700 | 1.02537400  | C -4.09530200 | 1.82269000  | -0.90474000 |
| C 19.66409100 | 8.65586600  | -3.47942900 | H 1.39499200  | -13.78158300 | 1.46549700  | H -3.15372000 | 3.41911300  | -2.01498400 |
| C 20.96155600 | 8.71209500  | -1.45942800 | C 3.44489700  | -15.85457200 | -1.07299700 | H -4.66188100 | 0.07996600  | 0.24025300  |
| C 20.35239100 | 9.76300600  | -3.95947100 | H 3.55010900  | -14.07306400 | -2.24664000 | C 4.24147700  | 3.82957600  | 0.46981500  |
| H 18.91896800 | 8.18786000  | -4.11682200 | C 2.99995000  | -16.46183600 | 0.11464500  | C 5.13065600  | 4.19507600  | -0.56045200 |
| C 21.64557300 | 9.82875500  | -1.92302700 | H 1.91217000  | -16.12706400 | 1.94876000  | C 4.46567100  | 4.35659600  | 1.75691600  |
| H 21.18854200 | 8.33633800  | -0.46559500 | H 4.01645600  | -16.43546100 | -1.78909700 | C 6.18146000  | 5.04441800  | -0.26838100 |
| C 21.35608300 | 10.37385400 | -3.18665600 | N 3.28410700  | -17.82045100 | 0.38574300  | H 4.98000600  | 3.83520900  | -1.57339200 |
| H 20.12531700 | 10.15334000 | -4.94595100 | C 2.32734100  | -18.63626300 | 1.05514800  | C 5.52792300  | 5.21649500  | 2.03164000  |
| H 22.40248200 | 10.29419400 | -1.30056000 | C 4.53137000  | -18.38595500 | -0.00641500 | H 3.80533700  | 4.06367300  | 2.56764700  |
| N 22.05612900 | 11.50374400 | -3.66708700 | C 0.97172000  | -18.58875100 | 0.69371300  | C 6.41089800  | 5.57392500  | 1.00957400  |
| C 21.38689000 | 12.48547700 | -4.45229700 | C 2.73059200  | -19.50609900 | 2.08013400  | S 7.41989700  | 5.63147800  | -1.43788000 |
| C 23.44126400 | 11.66938400 | -3.37653800 | C 4.57705300  | -19.65194400 | -0.61052400 | H 5.66864700  | 5.59269400  | 3.04097300  |
| C 20.11740200 | 12.95433800 | -4.07904100 | C 5.73084600  | -17.69058900 | 0.21334200  | C 7.59252300  | 6.45198700  | 1.07332300  |
| C 21.99433600 | 13.00484100 | -5.60604400 | C 0.04035300  | -19.38691100 | 1.35531600  | C 8.24889600  | 6.59058800  | -0.15804800 |
| C 23.93545200 | 12.92009200 | -2.97533500 | H 0.65549700  | -17.92509700 | -0.10492000 | O 6.80951400  | 6.51923900  | -2.43968600 |
| C 24.33005800 | 10.58966600 | -3.49659300 | C 1.79482300  | -20.31424600 | 2.72326600  | O 8.27064600  | 4.52102300  | -1.89285700 |
| C 19.46805200 | 13.91401600 | -4.85346100 | H 3.77696100  | -19.54383500 | 2.36609500  | C 8.12015900  | 7.13314200  | 2.17302300  |
| H 19.64723500 | 12.56476500 | -3.18151200 | C 5.79973700  | -20.20980100 | -0.97976300 | C 9.38675600  | 7.35644300  | -0.32994800 |
| C 21.34509500 | 13.97757800 | -6.36413700 | H 3.65215200  | -20.19233300 | -0.78589500 | C 9.26244800  | 7.91629100  | 2.01693300  |
| H 22.97409900 | 12.64246600 | -5.90069200 | C 6.94720400  | -18.24850200 | -0.17606500 | H 7.64247900  | 7.06590100  | 3.14644600  |
| C 25.29325300 | 13.08507300 | -2.70764100 | H 5.70282800  | -16.71546500 | 0.68944800  | C 9.92122000  | 8.04563100  | 0.77771500  |
| H 23.25097800 | 13.75677300 | -2.87697700 | C 0.44501400  | -20.25694000 | 2.37002100  | H 9.87633600  | 7.40360800  | -1.29752900 |
| C 25.68320000 | 10.75971600 | -3.20902300 | H -1.00555900 | -19.33746800 | 1.06406700  | H 9.64400500  | 8.46270400  | 2.87412700  |
| H 23.95489700 | 9.62237200  | -3.81569200 | H 2.12320900  | -20.98209200 | 3.51532000  | C 11.13883600 | 8.87623200  | 0.64014500  |
| C 20.07774100 | 14.43484600 | -5.99688000 | C 6.99081300  | -19.51147300 | -0.77054800 | C 12.08081500 | 8.97056600  | 1.67935600  |
| H 18.48579200 | 14.26710500 | -4.55045300 | H 5.81786500  | -21.19137600 | -1.44608000 | C 11.40255500 | 9.60030300  | -0.53585200 |
| H 21.82936300 | 14.36944400 | -7.25471700 | H 7.86675800  | -17.69704800 | 0.00148300  | C 13.22357300 | 9.75144300  | 1.55849700  |
| C 26.17416800 | 12.00710800 | -2.81748000 | H -0.28250200 | -20.88275800 | 2.87889400  | H 11.92722500 | 8.40917100  | 2.59669400  |
| H 25.66038800 | 14.06006000 | -2.39811000 | H 7.94130800  | -19.94652000 | -1.06584200 | C 12.54901400 | 10.37342000 | -0.67299200 |
| H 26.35852900 | 9.91381500  | -3.30651900 | C 0.55173000  | -3.90932500  | -0.94601700 | H 10.69182200 | 9.57020400  | -1.35701700 |
| H 19.57190300 | 15.18849900 | -6.59359200 | C 1.23236200  | -3.14206800  | 0.01563400  | C 13.48158700 | 10.46667600 | 0.37547500  |
| H 27.23058800 | 12.13743700 | -2.60096900 | C -0.36850200 | -3.24237300  | -1.77317500 | H 13.92895300 | 9.80435000  | 2.38096900  |

## M-5

|              |              |             |               |             |             |               |             |             |
|--------------|--------------|-------------|---------------|-------------|-------------|---------------|-------------|-------------|
| C 0.76745200 | -5.99621400  | -2.33908800 | H 1.96532800  | -3.61634800 | 0.66197800  | H 12.72492800 | 10.91658300 | -1.59540200 |
| C 0.79764100 | -5.36396600  | -1.08042400 | C -0.59310000 | -1.87552800 | -1.65607500 | N 14.64681000 | 11.25631700 | 0.24460200  |
| C 1.07449200 | -6.15573700  | 0.05201600  | H -0.93079000 | -3.80358100 | -2.51396100 | C 15.86948800 | 10.83904700 | 0.84581800  |
| C 1.30800500 | -7.50766900  | -0.11614700 | C 0.08740100  | -1.12097200 | -0.68649600 | C 14.61293000 | 12.48078600 | -0.48253800 |
| C 1.27682200 | -8.14489600  | -1.36486500 | H 1.53817600  | -1.21320900 | 0.90784800  | C 16.30674200 | 9.51062500  | 0.72619100  |
| C 0.99857600 | -7.36279900  | -2.48865700 | H -1.30638500 | -1.38695900 | -2.31187000 | C 16.65659900 | 11.75581400 | 1.55954000  |
| H 0.58313900 | -5.39628200  | -3.22521700 | N -0.14473000 | 0.27363400  | -0.55742000 | C 15.64711600 | 12.80180400 | -1.37542100 |
| H 1.08081200 | -5.71667000  | 1.04466200  | C 0.93997700  | 1.15513300  | -0.30505000 | C 13.55471100 | 13.38678200 | -0.30941300 |
| H 0.97267900 | -7.80762600  | -3.47938500 | C -1.46300000 | 0.78909000  | -0.67403700 | C 17.50155100 | 9.10903300  | 1.32088200  |
| C 1.78888500 | -10.04266200 | 0.01751800  | C 2.16781700  | 0.99114000  | -0.96622800 | H 15.70664200 | 8.79977700  | 0.16678200  |
| C 2.07593400 | -11.35934000 | 0.32500900  | C 0.80812200  | 2.21032200  | 0.61203300  | C 17.85906100 | 11.34956400 | 2.13537300  |
| C 2.13048400 | -12.30872500 | -0.71569200 | C -1.70808800 | 1.97731200  | -1.38095400 | H 16.32037700 | 12.78321800 | 1.65775100  |
| C 1.89065900 | -11.86185400 | -2.03065800 | C -2.54955700 | 0.12369800  | -0.08382200 | C 15.62302100 | 14.00779000 | -2.07342700 |
| C 1.61003800 | -10.52818100 | -2.32270300 | C 3.22952200  | 1.85054700  | -0.70792100 | H 16.46556200 | 12.10294400 | -1.51660000 |
| C 1.55406600 | -9.59018100  | -1.28885700 | H 2.28891900  | 0.18051100  | -1.67741800 | C 13.52986500 | 14.58212300 | -1.02568000 |
| H 2.28120100 | -11.65199800 | 1.34984800  | C 1.87065200  | 3.07417500  | 0.85149200  | H 12.75675200 | 13.14882600 | 0.38695400  |
| H 1.90100500 | -12.58450100 | -2.84099500 | H -0.13387000 | 2.35472600  | 1.13111000  | C 18.28670800 | 10.02477400 | 2.02480300  |
| H 1.42554500 | -10.22983700 | -3.35092700 | C -2.99859500 | 2.48386300  | -1.48452800 | H 17.82636700 | 8.07689100  | 1.21912200  |
|              |              |             |               |             |             | H 18.45725400 | 12.07166100 | 2.68488200  |

C 14.56392500 14.90273700 -1.90785000  
H 16.43166200 14.24108600 -2.76108200  
H 12.70321400 15.27258400 -0.88028300  
H 19.22111300 9.70989900 2.48050600  
H 14.54465500 15.83854200 -2.45900700  
C -5.47033600 2.36083900 -1.02401100  
C -6.38836900 2.23510600 0.03764000  
C -5.90004600 3.00984200 -2.19824500  
C -7.66380500 2.74534800 -0.11576700  
H -6.09233600 1.76745300 0.97146700  
C -7.18929700 3.52286900 -2.33304300  
H -5.21294100 3.09179700 -3.03513300  
C -8.09909000 3.39359700 -1.28056500  
S -8.97629700 2.69054700 1.11714600  
H -7.48094700 4.00954200 -3.25945400  
C -9.49808700 3.85092900 -1.20504200  
C -10.11289000 3.55593700 0.02028600  
O -8.63570700 3.52705300 2.27825300  
O -9.41906600 1.30566100 1.34021600  
C -10.25767300 4.51551800 -2.17113600  
C -11.42294900 3.88631800 0.31179900  
C -11.57893600 4.86196300 -1.89270900  
H -9.82481100 4.77454200 -3.13333700  
C -12.19070600 4.56012400 -0.65961800  
H -11.86117000 3.60795400 1.26500300  
H -12.14787000 5.40389500 -2.64220700  
C -13.59578700 4.93759300 -0.38626000  
C -14.57273000 4.90898500 -1.39667600  
C -14.00693900 5.33749500 0.89728000  
C -15.89178300 5.26589700 -1.14434900  
H -14.30130900 4.58558900 -2.39779000  
C -15.32561400 5.68487700 1.16364300  
H -13.27969700 5.39121900 1.70263700  
C -16.29436900 5.65805300 0.14471600  
H -16.62154400 5.23443300 -1.94651300  
H -15.61110100 5.98561100 2.16606700  
N -17.63650000 6.01593300 0.40931400  
C -18.70624100 5.33520400 -0.23935000  
C -17.93279500 7.05714200 1.33579800  
C -18.69399700 3.93673600 -0.36098900  
C -19.79350400 6.05612300 -0.75706700  
C -18.94758900 6.88908600 2.29047500  
C -17.22088300 8.26635100 1.30108300  
C -19.74381500 3.27870300 -0.99917900  
H -17.86121700 3.37286600 0.04739800  
C -20.84757100 5.38778400 -1.37720800  
H -19.80594000 7.13781400 -0.66822300  
C -19.24506400 7.91457400 3.18622500  
H -19.49807600 5.95417700 2.32430200

C -17.51286900 9.27924200 2.21276200  
H -16.44120100 8.40516600 0.55866100  
C -20.82807200 3.99752000 -1.50724600  
H -19.71930400 2.19550700 -1.08466600  
H -21.68227400 5.96077700 -1.77243200  
C -18.52804200 9.11255700 3.15724500  
H -20.03354400 7.76860900 3.91983700  
H -16.95189200 10.20927200 2.17332000  
H -21.64817100 3.48040900 -1.99709400  
H -18.75778900 9.90675600 3.86176900

### **Sr<sub>4</sub>Al<sub>14</sub>O<sub>25</sub>**

Sr 2.98149215 -0.00031133 4.35489083  
Sr 21.78272148 0.00112208 0.54978714  
Sr 9.40022051 0.00007723 4.35575623  
Sr 15.36420667 0.00056864 0.54874541  
Sr 3.41940301 4.25702037 4.70827114  
Sr 21.34425741 4.25830766 0.19646579  
Sr 8.96155513 4.25721539 4.70902823  
Sr 15.80216946 4.25779171 0.19559694  
Al 1.63346855 2.74252550 2.41497155  
Al 23.13029642 5.77266391 2.48988514  
Al 10.74827833 5.77172597 2.41619524  
Al 14.01546258 2.74314548 2.48828919  
Al 23.13037851 2.74388800 2.48959077  
Al 1.63306187 5.77141886 2.41479119  
Al 14.01525753 5.77200771 2.48839830  
Al 10.74848337 2.74292131 2.41619871  
Al 4.57938610 1.65840282 1.83351077  
Al 20.18430355 6.85666421 3.07139658  
Al 7.80246210 6.85574125 1.83389540  
Al 16.96125460 1.65909333 3.07063265  
Al 20.18462040 1.65932224 3.07111736  
Al 4.57900996 6.85563307 1.83345653  
Al 16.96086913 6.85642300 3.07087268  
Al 7.80277725 1.65847891 1.83397922  
Al 0.00030943 1.42426919 0.00005416  
Al -0.00020548 7.08945161 0.00014603  
Al 12.38208059 7.08995105 0.00196441  
Al 12.38245437 1.42478057 0.00187791  
Al 6.19063559 2.51723830 4.27230487  
Al 18.57300879 5.99786304 0.63261473  
Al 6.19042568 5.99691355 4.27220636  
Al 18.57327621 2.51816301 0.63237492  
Al 0.00014138 -0.00027297 2.45048397  
Al 12.38228661 0.00037019 2.45243876  
Al 0.00023489 4.25647066 -0.00025277  
Al 12.38224163 4.25737369 0.00178684  
O 1.07760812 2.86888475 0.73074202

O 23.68626114 5.64662728 4.17426560  
O 11.30468527 5.64552895 0.73208359  
O 13.45900975 2.86909354 4.17247295  
O 23.68611690 2.87003776 4.17396693  
O 1.07701422 5.64537885 0.73050744  
O 13.45883087 5.64569433 4.17251410  
O 11.30483948 2.86902283 0.73204778  
O 1.06791613 1.34781234 3.32180746  
O 23.69563228 7.16756402 1.58312848  
O 11.31348498 7.16649595 3.32316611  
O 13.45028737 1.34830964 1.58130038  
O 23.69626407 1.34916521 1.58294332  
O 1.06751413 7.16615540 3.32166203  
O 13.44992755 7.16674265 1.58139375  
O 11.31400690 1.34818621 3.32305726  
O 3.39601620 2.77737953 2.46343297  
O 21.36767485 5.73755099 2.44164793  
O 8.98566785 5.73662934 2.46393132  
O 15.77803734 2.77801963 2.44033599  
O 21.36781607 2.77838049 2.44101047  
O 3.39565548 5.73649308 2.46313314  
O 15.77787049 5.73717178 2.44068795  
O 8.98590613 2.77747261 2.46430571  
O 4.68918512 1.93471695 0.09107593  
O 20.07439305 6.58045371 4.81383387  
O 7.69311072 6.57963192 0.09139217  
O 17.07063570 1.93547618 4.81305559  
O 20.07472128 1.93575321 4.81347172  
O 4.68893417 6.57950707 0.09097807  
O 17.07028652 6.58021251 4.81334033  
O 7.69334523 1.93486863 0.09155233  
O 0.97411009 -0.00022479 0.83848928  
O 23.79016181 0.00105440 4.06618442  
O 11.40867657 -0.00002945 0.83995951  
O 13.35574357 0.00005794 4.06454880  
O 1.22128390 4.25690697 3.31460537  
O 23.54229631 4.25829013 1.59008082  
O 11.16010952 4.25732267 3.31601108  
O 13.60370381 4.25752318 1.58849519  
O 4.06281768 -0.00023259 2.06948799  
O 20.70165494 0.00081788 2.83532115  
O 8.31953844 -0.00007165 2.07006671  
O 16.44454596 0.00051317 2.83464572  
O 6.19097120 1.96753416 2.56553292  
O 18.57272896 6.54763815 2.33935750  
O 6.19064497 6.54649509 2.56538091  
O 18.57302561 1.96806626 2.33901830  
O 6.19051909 4.25707894 4.37980231  
O 18.57315349 4.25802307 0.52517512

**Table S1.** HER and AQYs of the reported MOP-based photocatalysts (Referring to the recent review paper<sup>1</sup> of CMP-based photocatalysts for hydrogen evolution).

| MOP-based Photocatalysts            | Metal Catalyst | Light Source | HER ( $\mu\text{mol h}^{-1} \text{g}^{-1}$ ) | AQY(@420 nm) (%) | Year | Ref       |
|-------------------------------------|----------------|--------------|----------------------------------------------|------------------|------|-----------|
| VH-MON ( <b>Our work</b> )          | Pt             | 200 W Xe     | 1250                                         |                  | 2014 | 2         |
| CP-CMP10                            | Pd             | 300 W Xe     | 174                                          | 0.42             | 2015 | 3         |
| B-BT-1,3,5                          | Pd/Pt          | 300 W Xe     | 400                                          |                  | 2016 | 4         |
| PCP4e                               | Pd             | 150 W Xe     | 1900                                         | 0.34 (@350 nm)   | 2016 | 5         |
| PCP2-100%PDI                        | Pd/Cu          | 150 W Xe     | 2171                                         |                  | 2016 | 6         |
| PCP2-100%PDI                        | Pd/Cu          | 150 W Xe     | 3142                                         |                  | 2016 | 7         |
| SP-CMP                              | Pd             | 300 W Xe     | 120                                          | 0.23             | 2016 | 7         |
| PTEB                                | Cu             | 300 W Xe     | 102                                          |                  | 2017 | 8         |
| PTEPB                               | Cu             | 300 W Xe     | 218                                          |                  | 2017 | 9         |
| PrCMP-3                             | Pt             | 300 W Xe     | 121                                          |                  | 2017 | 9         |
| PrPy                                | Pt             | 300 W Xe     | 3020                                         |                  | 2017 | 10        |
| aza-CMP/C2N                         | N/A            | 300 W Xe     | 100                                          | 4.3 (@600 nm)    | 2018 | 11        |
| PyDOBT-1                            | Pd             | 300 W Xe     | 5697                                         |                  | 2018 | 12        |
| PyDOBT-1                            | Pt             | 300 W Xe     | 8523                                         |                  | 2018 | 13        |
| DBTD-CMP1                           | Pd             | 300 W Xe     | 2460                                         |                  | 2018 | 13        |
| DBTD-CMP1                           | Pt             | 300 W Xe     | 4600                                         |                  | 2018 | 14        |
| S-CMP3                              | Pd             | 300 W Xe     | 3106                                         | 13.2             | 2019 | 14        |
| BDP-bdy-TPA                         | Pd             | 300 W Xe     | 2780                                         |                  | 2020 | 15        |
| H-MOP@SCMP-Pd2 ( <b>Our work</b> )  | Pd             | 300 W Xe     | 7100                                         | 3.72             | 2021 | 16        |
| BTT-CPP                             | Pd             | 300 W Xe     | 12633                                        | 3.3 (@365 nm)    | 2021 | 17        |
| PyBS-3                              | Pd             | 300 W Xe     | 430                                          |                  | 2021 | 18        |
| Py-TPA-CMP                          | Pt             | 350 W Xe     | 19200                                        | 15.3             | 2021 | 19        |
| PyDTDO-3                            | Pt             | 300 W Xe     | 16320                                        | 3.7              | 2021 | 20        |
| TPE-SOBT                            | Pd             | 300 W Xe     | 2990                                         | 3.88             | 2021 | 21        |
| 30% @Co@PCMP                        | Co             | 300 W Xe     | 17200                                        | 2.05             | 2021 | 22        |
| DBC-BTDO                            | Pd             | 300 W Xe     | 49340                                        | 26.58 (@450 nm)  | 2022 | 23        |
| BSO <sub>2</sub> -EDOT              | Pd             | 300 W Xe     | 158400                                       | 13.6 (@550 nm)   | 2022 | 24        |
| BTPT-CMP1                           | Pt             | 300 W Xe     | 5561                                         | 3.8              | 2022 | 25        |
| Py-T-BTDO-3                         | Pt             | 300 W Xe     | 78400                                        | 29.79            | 2022 | 26        |
| PySO-2                              | Pd             | 300 W Xe     | 23300                                        | 17.7             | 2022 | 27        |
| PF6A-SF                             | Pd             | 300 W Xe     | 17460                                        | 1.26             | 2022 | 28        |
| MOP-TADS-Pd2 ( <b>Our work</b> )    | Pd             | 300 W Xe     | 5270                                         |                  | 2022 | This work |
| AG-MOP-TADS-Pd2 ( <b>Our Work</b> ) | Pd             | 300 W Xe     | 12900 <sup>a</sup>                           | 1.02             | 2022 | This work |

<sup>a</sup> HER value based on the MOP-TADS-Pd2.

1. Y. Wang, A. Vogel, M. Sachs, R. S. Sprick, L. Wilbraham, S. J. A. Moniz, R. Godin, M. A. Zwijnenburg, J. R. Durrant, A.I. Copper and J. Tang, *Nature Energy* 2019, **4**, 746-760.
2. J. H. Park, K. C. Ko, N. Park, H. -W. Shin, E. Kim, N. Kang, J. H. Ko, S. M. Lee, H. J. Kim, T. K. Ahn, J. Y. Lee and S. U. Son, *J. Mater. Chem. A* 2014, **2**, 7656-7661.
3. R. S. Sprick, J. -X. Jiang, B. Bonillo, S. Ren, T. Ratvijitvech, P. Guiglion, M. A. Zwijnenburg, D. J. Adams and A. I. Copper, *J. Am. Chem. Soc.* 2015, **137**, 3265-3270.
4. C. Yang, B. C. Ma, L. Zhang, S. Lin, S. Ghasimi, K. Landfester, K. A. I. Zhang and X. Wang, *Angew. Chem. Int. Ed.* 2016, **55**, 9202-9206.
5. L. Li, Z. Cai, Q. Wu, W. -Y. Lo, N. Zhang, L. X. Chen and L. Yu, *J. Am. Chem. Soc.* 2016, **138**, 7681-7686.
6. L. Li and Z. Cai, *Polym. Chem.* 2016, **7**, 4937-4943.
7. R. S. Sprick, B. Bonillo, M. Sachs, R. Clowes, J. R. Durrant, D. J. Adams and A. I. Cooper, *Chem. Commun.* 2016, **52**, 10008-10011.
8. L. Wang, Y. Wan, Y. Ding, S. Wu, Y. Zhang, X. Zhang, G. Zhang, Y. Xiong, X. Wu, J. Yang and H. Xu, *Adv. Mater.* 2017, **29**, 1702428.
9. Y. Xu, N. Mao, S. Feng, C. Zhang, F. Wang, Y. Chen, J. Zeng and J. -X. Jiang, *Macromol. Chem. Phys.* 2017, **218**, 1700049.
10. Y. Xu, C. Zhang, P. Mu, N. Mao, X. Wang, Q. He, F. Wang and J. -X. Jiang, *Sci. China Chem.* 2017, **60**, 1075-1083.
11. L. Wang, X. Zheng, L. Chen, Y. Xiong and H. Xu, *Angew. Chem. Int. Ed.* 2018, **57**, 3454-3458.

12. Y. Zhao, W. Ma, Y. Xu, C. Zhang, Q. Wang, T. Yang, X. Gao, F. Wang, C. Yan and J. -X. Jiang, *Macromolecules* 2018, **51**, 9502-9508.
13. Z. Wang, X. Yang, T. Yang, Y. Zhao, F. Wang, Y. Chen, J. H. Zeng, C. Yan, F. Huang and J. -X. Jiang, *ACS Catal.* 2018, **8**, 8590-8596.
14. R. S. Sprick, Y. Bai, A. A. Y. Guibert, M. Zbiri, C. M. Aitchison, L. Wilbraham, Y. Yan, D. J. Woods, M. A. Zwijnenburg and A. I. Cooper, *Chem Mater.* 2019, **31**, 305-313.
15. X. -J. Xiao, Y. Wang, W. -R. Wang, J. Li, J. Wang, Z. -W. Xu, J. Li, J. Yao and W. -S. Li, *Macromolecules* 2020, **53**, 2454-5463.
16. S. H. Ryu, S. M. Lee, H. J. Kim, Y. -J. Ko, K. C. Ko and S. U. Son, *J. Mater. Chem. A*, 2021, **9**, 22262-22268.
17. J. -L. Wang, G. Ouyang, D. Wang, J. Li, J. Yao, W. -S. Li and H. Li, *Macromolecules* 2021, **54**, 2661-2664.
18. C. Shu, C. Han, X. Yang, C. Zhang, Y. Chen, S. Ren, F. Wang, F. Huang and J. -X. Jiang, *Adv. Mater.* 2021, **33**, 2008498.
19. M. G. Mohamed, M. H. Elsayed, A. M. Elewa, A. F. M. EL-Mahdy, C. -H. Yang, A. A. K. Mohammed, H. -H. Chou and S. -W. Kuo, *Catal. Sci. Technol.* 2021, **11**, 2229-2241.
20. C. Han, P. Dong, H. Tang, P. Zheng, C. Zhang, F. Wang, F. Huang and J. -X. Jiang, *Chem. Sci.* 2021, **12**, 1796-1802.
21. X. Zhao, B. Chen, W. Dong, S. Wang, Y. Xiang and H. Chen, *J. Mater. Chem. A* 2021, **9**, 10208-10216.
22. C. Yang, Z. Cheng, G. Divitini, C. Qian, B. Hou and Y. Liao, *J. Mater. Chem. A* 2021, **9**, 19894-19900.
23. C. Han, S. Xiang, M. Ge, P. Xie, C. Zhang and J. -X. Jiang, *Small* 2022, **18**, 2202072.
24. Z. -R. Tang, Y. -Q. Xing, J. -Z. Cheng, G. Zhang, Z. -Q. Shen, Y. -J. Zhang, G. Liao, L. Chen and S. -Y. Liu, *Chem. Sci.* 2022, **13**, 1725-1733.
25. X. Han, Y. Zhang, Y. Dong, J. Zhao, S. Ming and J. Zhang, *RSC Adv.* 2022, **12**, 708-718.
26. C. Han, S. Xiang, P. Xie, P. Dong, C. Shu, C. Zhang and J. -X. Jiang, *Adv. Funct. Mater.* 2022, **32**, 2109423.
27. H. Zhao, Y. Dong, P. Sun, Y. Bai, C. Ru, X. Wu, Z. Li, X. Han, J. Wu and X. Pan, *ACS Appl. Energy Mater.* 2022, **5**, 4631-4640.
28. R. Li, C. Zhang, C. -X. Cui, Y. Hou, H. Niu, C. -H. Tan, X. Yang, F. Huang, J. -X. Jiang and Y. Zhang, *Polymer*, 2022, **240**, 124509.
